# Supplementary material for: Dissection of brassinosteroid-regulated proteins in rice embryos during germination by quantitative proteomics
Source: PubMed Central journal article supplement (PMC5050409; doi:10.1038/srep34583), 2016-10-05
Supplement: srep34583-s1.pdf [file srep34583-s1.pdf]

## **Supplementary Information**

### **Dissection of brassinosteroid-regulated proteins in rice embryos during germination by quantitative proteomics**

**Qian-Feng Li, Min Xiong, Peng Xu, Li-Chun Huang, Chang-Quan Zhang,**

**Qiao-Quan Liu\***

**Supplementary Figure S1** Images of germinating Nipponbare seeds.

**Supplementary Figure S2** SDS-PAGE analysis of extracted proteins.

**Supplementary Figure S3** Protein ratio distribution analysis.

**Supplementary Table S1** List of proteins down-regulated in embryos of germinated rice seeds in response to BRZ-treatment by iTRAQ.

**Supplementary Table S2** List of proteins up-regulated in embryos of germinated rice seeds in response to BRZ-treatment by iTRAQ.

**Supplementary Table S3** List of proteins down-regulated in embryos of germinated rice seeds of mutant d61-1 by iTRAQ.

**Supplementary Table S4** List of proteins up-regulated in embryos of germinated rice seeds of mutant d61-1 by iTRAQ.

**Supplementary Table S5** List of common target proteins in embryos of germinated rice seeds in response to both BR-deficiency and BR-insensitivity by iTRAQ (fold-change criterion  $\geq 1.5$  or  $\leq 0.67$ )

**Supplementary Table S6** List of primers used for quantitative real-time PCR assay

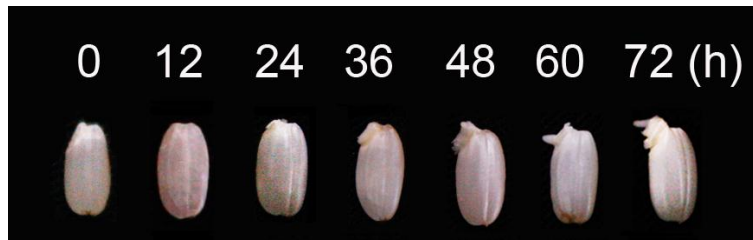

**Supplementary Figure S1** Images of germinating Nipponbare seeds.

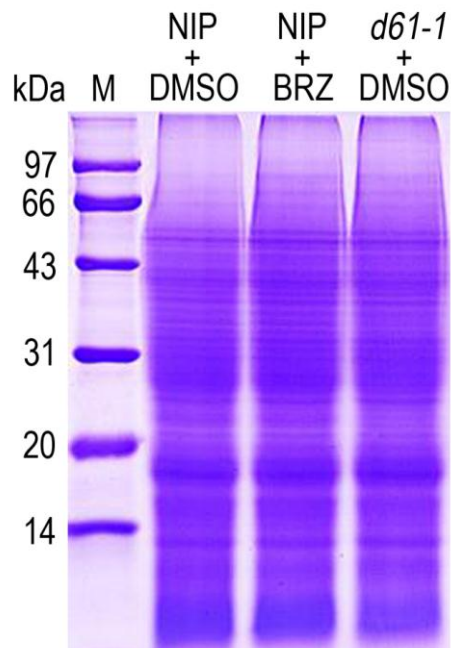

**Supplementary Figure S2** SDS-PAGE analysis of extracted proteins.

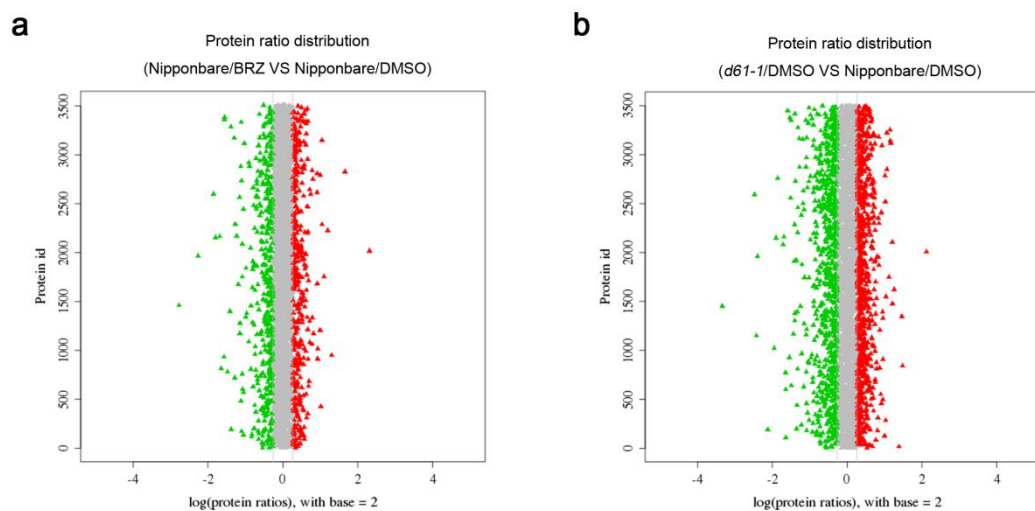

**Supplementary Figure S3** Protein ratio distribution analysis.

**Supplementary Table 1.** List of proteins down-regulated in embryos of germinated rice seeds in response to BRZ-treatment by iTRAQ

| Gene ID      | NIP(BRZ / Mock)<br>fold change | Protein<br>score | Unique<br>Peptide | Sequence<br>coverage(%) | Description                                                    |
|--------------|--------------------------------|------------------|-------------------|-------------------------|----------------------------------------------------------------|
| Os02g0248800 | 0.208                          | 1443             | 3                 | 7.1                     | Similar to Glutelin type-B 2 precursor.                        |
| Os03g0427300 | 0.336                          | 2685             | 10                | 30.2                    | Glutelin type-A III precursor.                                 |
| Os05g0499100 | 0.384                          | 757              | 4                 | 25.8                    | 26 kDa globulin (Alpha-globulin).                              |
| Os02g0249000 | 0.406                          | 804              | 10                | 22.7                    | Glutelin, Seed storage protein                                 |
| Os06g0507200 | 0.414                          | 734              | 4                 | 22.8                    | Bifunctional inhibitor/plant lipid transfer protein.           |
| Os05g0268500 | 0.451                          | 131              | 5                 | 12                      | Similar to Serine carboxypeptidase 2.                          |
| Os02g0249800 | 0.452                          | 3900             | 2                 | 36.3                    | Glutelin precursor. >Os02t0249900-01 Glutelin precursor.       |
| Os02g0453600 | 0.459                          | 539              | 5                 | 28.1                    | Similar to Glutelin.                                           |
| Os06g0675700 | 0.463                          | 831              | 4                 | 18                      | Similar to High pI alpha-glucosidase.                          |
| Os08g0530400 | 0.465                          | 71               | 2                 | 8.8                     | Moco containing protein (Moco containing protein(OsMCP)).      |
| Os07g0214600 | 0.465                          | 606              | 3                 | 25.5                    | Similar to Seed allergenic protein RA17 precursor.             |
| Os07g0214300 | 0.474                          | 1815             | 2                 | 28.3                    | Seed allergenic protein RAG2 precursor.                        |
| Os06g0133000 | 0.482                          | 495              | 9                 | 22.2                    | Granule-bound starch synthase I, chloroplast precursor         |
| Os07g0214100 | 0.506                          | 344              | 3                 | 28.2                    | Seed allergenic protein RA17 precursor.                        |
| Os03g0760800 | 0.532                          | 166              | 2                 | 29                      | Similar to GAST1 protein precursor.                            |
| Os05g0329100 | 0.555                          | 917              | 3                 | 42.7                    | Prolamin.                                                      |
| Os02g0249600 | 0.57                           | 3780             | 1                 | 34.9                    | Similar to Glutelin.                                           |
| Os02g0765600 | 0.576                          | 660              | 9                 | 32.5                    | Alpha-amylase glycoprotein, Degradation of starch granule      |
| Os03g0812000 | 0.587                          | 305              | 2                 | 6.6                     | DNA topoisomerase, type IIA,                                   |
| Os06g0676700 | 0.593                          | 981              | 5                 | 18.4                    | Similar to High pI alpha-glucosidase.                          |
| Os07g0574800 | 0.622                          | 3113             | 3                 | 56.7                    | Tubulin alpha-1 chain. >Os07t0574800-02 Tubulin alpha-1 chain. |
| Os11g0582400 | 0.626                          | 702              | 2                 | 5.1                     | Similar to Embryo-specific protein.                            |

|              |       |      |    |      |                                                                     |
|--------------|-------|------|----|------|---------------------------------------------------------------------|
| Os06g0214300 | 0.627 | 60   | 2  | 9.9  | Alpha/beta hydrolase fold-3 domain containing protein.              |
| Os07g0213600 | 0.627 | 238  | 2  | 24.7 | Bifunctional inhibitor/plant lipid transfer protein                 |
| Os03g0734200 | 0.639 | 254  | 1  | 17.4 | Conserved hypothetical protein.                                     |
| Os05g0499600 | 0.65  | 172  | 3  | 10.7 | UDP-glucuronosyl/UDP-glucosyltransferase family protein.            |
| Os07g0529600 | 0.65  | 333  | 6  | 25.1 | Similar to Thiazole biosynthetic enzyme 1-1, chloroplast precursor. |
| Os04g0628600 | 0.665 | 251  | 5  | 5.5  | Conserved hypothetical protein.                                     |
| Os07g0237100 | 0.667 | 121  | 2  | 8.5  | RNA recognition motif domain domain containing protein.             |
| Os11g0213600 | 0.682 | 180  | 5  | 11.6 | Peptidase S10, serine carboxypeptidase family protein.              |
| Os02g0816500 | 0.689 | 110  | 1  | 10   | Tubulin binding cofactor A family protein.                          |
| Os02g0209300 | 0.69  | 78   | 1  | 13.7 | Hypothetical conserved gene.                                        |
| Os05g0111300 | 0.692 | 56   | 2  | 26.2 | Similar to B22EL8 protein.                                          |
| Os01g0652800 | 0.693 | 133  | 3  | 8.9  | Protein of unknown function DUF231.                                 |
| Os04g0676700 | 0.696 | 106  | 2  | 7.3  | Similar to H0101F08.8 protein.                                      |
| Os07g0301200 | 0.698 | 187  | 4  | 9.4  | Similar to RNA helicase (Fragment).                                 |
| Os04g0473150 | 0.7   | 703  | 2  | 22.2 | Similar to photosystem II protein D1.                               |
| Os06g0473800 | 0.704 | 467  | 2  | 11.7 | Oleosin family protein.                                             |
| Os04g0486950 | 0.717 | 721  | 11 | 26.3 | Similar to Malate synthase.                                         |
| Os05g0405000 | 0.718 | 1494 | 14 | 22.5 | Orthophosphate dikinase precursor (EC 2.7.9.1).                     |
| Os03g0207250 | 0.719 | 131  | 3  | 26.1 | Ribosomal protein/NADH dehydrogenase domain protein.                |
| Os03g0385400 | 0.725 | 882  | 4  | 30.3 | Bifunctional inhibitor/plant lipid protein.                         |
| Os08g0345800 | 0.729 | 289  | 5  | 22.5 | Similar to Glucose-1-phosphate adenylyltransferase small subunit    |
| Os05g0358400 | 0.729 | 115  | 3  | 11.4 | Butirosin biosynthesis, BtrG-like domain containing protein.        |
| Os06g0139900 | 0.73  | 262  | 1  | 26.4 | Similar to Beta 1 subunit of 20S proteasome.                        |
| Os12g0543600 | 0.738 | 72   | 2  | 6.4  | Similar to sarcosine oxidase.                                       |
| Os02g0139700 | 0.739 | 232  | 7  | 9.7  | Similar to Cycloartenol synthase.                                   |
| Os06g0708832 | 0.742 | 81   | 4  | 14.4 | Similar to arogenate dehydrogenase.                                 |

|              |       |      |    |      |                                                                    |
|--------------|-------|------|----|------|--------------------------------------------------------------------|
| Os03g0130300 | 0.742 | 122  | 2  | 27.2 | Similar to Cp-thionin.                                             |
| Os05g0104650 | 0.743 | 338  | 9  | 11.1 | Similar to Formylglycinamide ribonucleotide amidotransferase.      |
| Os06g0726400 | 0.743 | 591  | 12 | 15.7 | Branching enzyme-I precursor (Starch-branching enzyme I).          |
| Os11g0636900 | 0.748 | 181  | 4  | 8.9  | Nucleotide-binding, alpha-beta plait domain containing protein.    |
| Os04g0118400 | 0.75  | 7065 | 1  | 51.2 | Similar to Elongation factor EF-2 (Fragment).                      |
| Os03g0798600 | 0.752 | 167  | 1  | 12.3 | Similar to 40S ribosomal protein S15 (Fragment).                   |
| Os04g0404400 | 0.753 | 841  | 7  | 31.1 | Similar to H0502B11.4 protein.                                     |
| Os08g0417100 | 0.756 | 224  | 5  | 25.5 | Similar to cDNA, clone: J100014C05, full insert sequence.          |
| Os05g0133100 | 0.757 | 229  | 2  | 9.4  | Similar to PII protein (Fragment).                                 |
| Os06g0221300 | 0.757 | 227  | 3  | 22.8 | Similar to Dehydration stress-induced protein.                     |
| Os09g0515500 | 0.758 | 134  | 3  | 5.9  | Translation initiation factor 2 related domain containing protein. |
| Os03g0810800 | 0.759 | 360  | 4  | 24.2 | Similar to Short-chain alcohol dehydrogenase.                      |
| Os01g0210500 | 0.762 | 1133 | 6  | 45   | Similar to SOUL-like protein.                                      |
| Os02g0109100 | 0.765 | 668  | 4  | 12.1 | Similar to diphosphomevalonate decarboxylase.                      |
| Os03g0842900 | 0.768 | 1047 | 13 | 43.9 | Similar to Steroleosin-B.                                          |
| Os03g0111300 | 0.779 | 693  | 3  | 26   | Nonspecific lipid-transfer protein 2 (nsLTP2).                     |
| Os04g0614600 | 0.781 | 702  | 7  | 36.2 | Similar to Viroid RNA-binding protein (Fragment).                  |
| Os03g0429000 | 0.782 | 571  | 3  | 37.4 | Proteinase inhibitor I25, cystatin domain containing protein.      |
| Os08g0519400 | 0.782 | 193  | 3  | 10   | Apolipoprotein/apolipoporphin domain containing protein.           |
| Os05g0301500 | 0.786 | 255  | 3  | 8.8  | Similar to Ribophorin I (Fragment).                                |
| Os07g0150200 | 0.79  | 1059 | 1  | 45.7 | Similar to 40S ribosomal protein S12-1.                            |
| Os01g0111600 | 0.793 | 230  | 3  | 20.7 | Similar to MOTHER of FT and TF1 protein.                           |
| Os05g0557100 | 0.793 | 95   | 4  | 10.1 | Peptidase A1 domain containing protein.                            |
| Os04g0107900 | 0.795 | 1487 | 3  | 26.1 | Heat shock protein 81-1 (HSP81-1) (Heat shock protein 83).         |
| Os07g0195400 | 0.799 | 496  | 9  | 23.7 | Phosphoacetylglucosamine mutase domain containing protein.         |
| Os03g0231600 | 0.799 | 241  | 3  | 9.4  | Similar to Branched-chain-amino-acid aminotransferase 3.           |

|              |       |      |    |      |                                                                       |
|--------------|-------|------|----|------|-----------------------------------------------------------------------|
| Os07g0639900 | 0.8   | 205  | 5  | 22.5 | Thymidylate kinase-like protein.                                      |
| Os06g0320000 | 0.8   | 127  | 3  | 30.2 | Thioredoxin fold domain containing protein.                           |
| Os03g0295800 | 0.803 | 634  | 2  | 10.9 | Gamma interferon inducible GILT protein.                              |
| Os04g0165700 | 0.804 | 312  | 3  | 9.5  | Cysteine synthase.                                                    |
| Os05g0457700 | 0.806 | 186  | 4  | 15.9 | Tetratricopeptide-like helical domain containing protein.             |
| Os09g0535300 | 0.807 | 124  | 2  | 6.6  | XAP5 protein family protein.                                          |
| Os04g0546500 | 0.807 | 836  | 2  | 13.5 | Similar to Oleosin.                                                   |
| Os09g0484200 | 0.808 | 2271 | 7  | 58   | Hypothetical protein.                                                 |
| Os06g0264300 | 0.809 | 1082 | 6  | 23.7 | Similar to RAD23, isoform I.                                          |
| Os02g0779200 | 0.81  | 204  | 5  | 10.7 | Similar to Subtilisin-like protease (Fragment).                       |
| Os06g0112200 | 0.812 | 274  | 3  | 15.4 | Purine and other phosphorylases, family 1 protein.                    |
| Os06g0198700 | 0.813 | 89   | 3  | 18.5 | CHD5-like protein domain containing protein.                          |
| Os03g0747800 | 0.815 | 1563 | 5  | 37.8 | Cysteine synthase.                                                    |
| Os12g0430000 | 0.815 | 414  | 5  | 10.2 | Hypothetical conserved gene.                                          |
| Os02g0158900 | 0.816 | 244  | 6  | 18.8 | Similar to SNF4.                                                      |
| Os03g0249300 | 0.816 | 137  | 2  | 10.8 | Nucleotide-sensitive chloride conductance regulator protein.          |
| Os01g0179300 | 0.817 | 305  | 3  | 8.2  | Similar to BRI1-KD interacting protein 128 (Fragment).                |
| Os03g0137500 | 0.818 | 227  | 4  | 16.3 | Similar to VDAC3.1.                                                   |
| Os04g0390800 | 0.818 | 2520 | 16 | 54.8 | NAD(P)-binding domain containing protein.                             |
| Os12g0183300 | 0.819 | 87   | 3  | 23   | Similar to 3~(2~),5~-bisphosphate nucleotidase.                       |
| Os03g0841700 | 0.82  | 622  | 2  | 30   | Similar to Prohibitin.                                                |
| Os04g0431100 | 0.822 | 112  | 3  | 17.6 | GrpE protein homolog.                                                 |
| Os08g0549300 | 0.822 | 403  | 1  | 10.9 | Similar to Acyl carrier protein III, chloroplast precursor (ACP III). |
| Os07g0586200 | 0.823 | 201  | 6  | 19.4 | Similar to Esterase precursor.                                        |
| Os10g0464400 | 0.823 | 142  | 3  | 9.3  | Haloacid dehalogenase-like hydrolase domain containing protein.       |
| Os04g0165300 | 0.825 | 74   | 2  | 8.9  | Conserved hypothetical protein.                                       |

|              |       |      |   |      |                                                           |
|--------------|-------|------|---|------|-----------------------------------------------------------|
| Os05g0346500 | 0.825 | 312  | 6 | 11.4 | Glycoside hydrolase, family 85 domain containing protein. |
| Os08g0562700 | 0.826 | 461  | 4 | 11.7 | Similar to peptidase M1 family protein.                   |
| Os03g0240700 | 0.826 | 133  | 1 | 10.1 | Similar to Erwinia induced protein 2.                     |
| Os02g0168800 | 0.829 | 143  | 4 | 17   | Similar to Porphobilinogen deaminase (Fragment).          |
| Os03g0337900 | 0.831 | 371  | 5 | 13.5 | Similar to predicted protein.                             |
| Os06g0152100 | 0.831 | 1551 | 2 | 24.4 | Similar to Profilin-2.                                    |
| Os03g0122200 | 0.832 | 78   | 3 | 16   | Similar to 50S ribosomal protein L11.                     |

**Supplementary Table 2.** List of proteins up-regulated in embryos of germinated rice seeds in response to BRZ-treatment by iTRAQ

| Gene ID      | NIP(BRZ / Mock)<br>fold change | Protein<br>score | Unique<br>Peptide | Sequence<br>coverage(%) | Description                                               |
|--------------|--------------------------------|------------------|-------------------|-------------------------|-----------------------------------------------------------|
| Os03g0652100 | 2.293                          | 233              | 4                 | 8.2                     | Not CCR4-Not complex component.                           |
| Os01g0815800 | 2.061                          | 682              | 1                 | 19.8                    | Similar to 60S ribosomal protein L24-A.                   |
| Os01g0866600 | 2.018                          | 300              | 3                 | 54.8                    | Similar to bolA-like protein.                             |
| Os03g0799000 | 1.997                          | 126              | 2                 | 18.4                    | Similar to Histone H1.                                    |
| Os06g0319700 | 1.888                          | 170              | 1                 | 20.2                    | Similar to 60S ribosomal protein L31.                     |
| Os02g0675700 | 1.741                          | 236              | 4                 | 18.4                    | DUF248, methyltransferase putative family protein.        |
| Os05g0486700 | 1.676                          | 509              | 1                 | 19.9                    | Ribosomal protein L24e domain containing protein.         |
| Os12g0498800 | 1.641                          | 64               | 2                 | 7.9                     | Conserved hypothetical protein.                           |
| Os03g0708100 | 1.62                           | 328              | 1                 | 17.8                    | Phytanoyl-CoA dioxygenase family protein.                 |
| Os06g0705400 | 1.607                          | 205              | 1                 | 11.7                    | Similar to Nonspecific lipid-transfer protein 2P (LTP2P). |
| Os02g0796900 | 1.604                          | 98               | 1                 | 20                      | Similar to 60S ribosomal protein L39.                     |
| Os01g0880800 | 1.585                          | 891              | 5                 | 16.8                    | Similar to Acyl-[acyl-carrier-protein] desaturase.        |
| Os11g0169800 | 1.576                          | 100              | 3                 | 11.3                    | Similar to Long-chain-fatty-acid--CoA ligase 4.           |

|              |       |      |   |      |                                                           |
|--------------|-------|------|---|------|-----------------------------------------------------------|
| Os03g0579300 | 1.566 | 225  | 1 | 20.4 | 60S ribosomal protein L19.                                |
| Os07g0119400 | 1.554 | 142  | 4 | 11.6 | Similar to Pectinesterase like protein.                   |
| Os05g0555800 | 1.545 | 290  | 2 | 37.5 | Similar to 60S ribosomal protein L35a-3.                  |
| Os05g0459900 | 1.54  | 407  | 3 | 23.9 | Similar to 60S ribosomal protein L36-1.                   |
| Os10g0437600 | 1.533 | 133  | 3 | 5.7  | Similar to Starch synthase II, chloroplast precursor.     |
| Os07g0691800 | 1.529 | 1281 | 1 | 37.3 | Similar to 26S proteasome subunit 4-like protein.         |
| Os02g0587000 | 1.529 | 569  | 2 | 20.8 | Similar to Glycine rich protein (Fragment).               |
| Os09g0127700 | 1.506 | 221  | 2 | 21.5 | Conserved hypothetical protein.                           |
| Os03g0118800 | 1.486 | 176  | 3 | 12.7 | Similar to Hydroxymethylglutaryl-CoA synthase.            |
| Os02g0804100 | 1.486 | 242  | 1 | 16.1 | Similar to predicted protein.                             |
| Os07g0184800 | 1.485 | 81   | 1 | 7.2  | Similar to Variant of histone H1.                         |
| Os03g0774200 | 1.484 | 170  | 4 | 18.4 | Similar to NADH-ubiquinone oxidoreductase subunit 8.      |
| Os01g0376700 | 1.472 | 400  | 2 | 11.1 | Similar to Sucrose-phosphatase.                           |
| Os03g0337800 | 1.467 | 356  | 2 | 24   | Similar to 60S ribosomal protein L19 (Fragment).          |
| Os07g0240300 | 1.459 | 96   | 3 | 9.9  | Similar to OSIGBa0153E02-OSIGBa0093I20.13 protein.        |
| Os09g0402100 | 1.442 | 283  | 4 | 30.5 | PF1 protein.                                              |
| Os02g0793300 | 1.423 | 162  | 6 | 9.5  | Similar to Nudix hydrolase 3 (AtNUDT3). Splice isoform 2. |
| Os07g0608700 | 1.423 | 124  | 2 | 32.5 | Similar to small nuclear ribonucleoprotein G.             |
| Os03g0805200 | 1.421 | 1077 | 5 | 24.6 | Similar to RNA helicase (Fragment).                       |
| Os02g0329800 | 1.419 | 159  | 3 | 9.2  | Glycosyltransferase AER61.                                |
| Os03g0200500 | 1.411 | 2811 | 3 | 55.3 | 40S ribosomal protein S3a (CYC07 protein).                |
| Os11g0602200 | 1.41  | 219  | 3 | 6.4  | Similar to SET domain protein SDG111.                     |
| Os10g0355800 | 1.391 | 2143 | 4 | 38.1 | Similar to ATP synthase CF1 beta subunit.                 |
| Os02g0653800 | 1.389 | 996  | 1 | 49.8 | Similar to GTP-binding protein.                           |
| Os12g0506400 | 1.387 | 95   | 1 | 6.7  | Cornichon family protein.                                 |
| Os06g0150600 | 1.386 | 111  | 3 | 7.4  | Transferase family protein.                               |



|              |       |      |    |      |                                                              |
|--------------|-------|------|----|------|--------------------------------------------------------------|
| Os03g0720300 | 1.384 | 452  | 5  | 26.6 | Similar to Glutamate decarboxylase isozyme 1.                |
| Os12g0166500 | 1.381 | 159  | 4  | 14.4 | Similar to Nrap protein, expressed.                          |
| Os02g0550100 | 1.38  | 419  | 1  | 10.8 | Similar to Vacuolar ATP synthase 16 kDa proteolipid subunit. |
| Os05g0542900 | 1.378 | 194  | 2  | 7.4  | Pectin lyase fold domain containing protein.                 |
| Os05g0386800 | 1.371 | 66   | 3  | 9.2  | Similar to Phytochelatin synthetase-like protein.            |
| Os04g0249600 | 1.371 | 151  | 2  | 23.9 | Rhodanese-like domain containing protein.                    |
| Os09g0539500 | 1.367 | 784  | 3  | 36.6 | Similar to SKP1-like protein 1A.                             |
| Os05g0566500 | 1.363 | 372  | 6  | 11.8 | Similar to Initiation factor 3d (Fragment).                  |
| Os03g0368000 | 1.356 | 639  | 5  | 27.6 | Similar to Peroxidase 1.                                     |
| Os02g0284600 | 1.353 | 1167 | 4  | 29.2 | Similar to 60S ribosomal protein L27.                        |
| Os02g0591800 | 1.347 | 86   | 3  | 13   | Brix domain containing protein.                              |
| Os01g0360600 | 1.347 | 90   | 5  | 25.7 | Dephospho-CoA kinase family protein.                         |
| Os05g0564200 | 1.338 | 59   | 2  | 8.6  | U2 snRNP auxiliary factor, small subunit.                    |
| Os05g0105100 | 1.336 | 423  | 1  | 29.1 | Similar to Small GTPase rab11-related.                       |
| Os05g0494000 | 1.334 | 231  | 6  | 13.9 | Similar to Cytochrome P450 98A1.                             |
| Os11g0168200 | 1.322 | 1855 | 11 | 28   | 60S ribosomal protein L3.                                    |
| Os07g0688800 | 1.321 | 248  | 4  | 8.5  | Aldehyde dehydrogenase domain containing protein.            |
| Os01g0348700 | 1.319 | 422  | 3  | 20.4 | Similar to 60S ribosomal protein L23a (L25).                 |
| Os03g0263500 | 1.318 | 148  | 2  | 9.7  | Similar to Splicing factor 3A subunit 2.                     |
| Os03g0264400 | 1.317 | 186  | 4  | 11.2 | Anthranilate synthase alpha 2 subunit.                       |
| Os08g0101400 | 1.309 | 100  | 3  | 6.6  | Similar to cDNA clone:J023074F23, full insert sequence.      |
| Os03g0823700 | 1.307 | 564  | 3  | 40.9 | Similar to Ras-related protein Rab11C.                       |
| Os08g0465800 | 1.304 | 952  | 8  | 33.4 | Similar to Glutamate decarboxylase.                          |
| Os08g0555200 | 1.298 | 238  | 3  | 6.7  | Nonaspanin (TM9SF) family protein.                           |
| Os05g0103100 | 1.298 | 788  | 3  | 23.1 | Translocon-associated beta family protein.                   |
| Os03g0700400 | 1.297 | 1056 | 3  | 37.3 | Similar to LOX4 (Fragment).                                  |

|              |       |      |    |      |                                                                      |
|--------------|-------|------|----|------|----------------------------------------------------------------------|
| Os09g0485900 | 1.294 | 1741 | 1  | 41.1 | Similar to 60S ribosomal protein L9 (Gibberellin-regulated protein). |
| Os07g0500300 | 1.293 | 303  | 3  | 32.4 | C2 calcium-dependent membrane targeting domain protein.              |
| Os02g0503400 | 1.29  | 99   | 2  | 13.8 | Similar to 60S ribosomal protein L35.                                |
| Os03g0750000 | 1.288 | 2653 | 1  | 25.9 | Similar to ethylene-responsive protein.                              |
| Os03g0858400 | 1.285 | 218  | 5  | 14.2 | WD40 repeat-like domain containing protein.                          |
| Os07g0191200 | 1.284 | 1341 | 4  | 18.6 | Plasma membrane H <sup>+</sup> ATPase.                               |
| Os08g0117300 | 1.283 | 2212 | 3  | 57   | Similar to 40S ribosomal protein S13.                                |
| Os08g0486200 | 1.283 | 73   | 2  | 5.5  | Similar to Splicing factor SC35.                                     |
| Os03g0154700 | 1.28  | 1328 | 5  | 27.7 | Similar to 40S ribosomal protein S9.                                 |
| Os04g0497200 | 1.275 | 169  | 4  | 9.3  | Cellulase precursor.                                                 |
| Os08g0178100 | 1.272 | 112  | 4  | 5.7  | Pep3/Vps18/deep orange domain containing protein.                    |
| Os11g0171300 | 1.269 | 278  | 4  | 13.1 | Fructose-bisphosphate aldolase, chloroplast precursor.               |
| Os01g0896700 | 1.268 | 902  | 3  | 34.5 | Similar to 60S ribosomal protein L5.                                 |
| Os01g0140500 | 1.264 | 575  | 2  | 10.1 | Similar to 60S ribosomal protein L26B.                               |
| Os02g0199900 | 1.264 | 1395 | 4  | 43   | Similar to 26S proteasome regulatory complex subunit p42D.           |
| Os07g0137900 | 1.262 | 176  | 2  | 10.3 | Hypothetical conserved gene.                                         |
| Os05g0592400 | 1.26  | 485  | 15 | 17.2 | UV-damaged DNA binding protein.                                      |
| Os01g0358400 | 1.259 | 2745 | 1  | 43.4 | Similar to 40S ribosomal protein S4.                                 |
| Os03g0192400 | 1.258 | 257  | 3  | 26.8 | GRIM-19 family protein.                                              |
| Os02g0586500 | 1.257 | 87   | 1  | 10.6 | Similar to OSIGBa0124N08.5 protein.                                  |
| Os02g0229000 | 1.257 | 774  | 2  | 25.4 | Similar to 40S ribosomal protein S19-like.                           |
| Os07g0490300 | 1.256 | 170  | 2  | 9.9  | Similar to Preproacrosin.                                            |
| Os10g0571200 | 1.256 | 424  | 6  | 18.8 | Similar to Pyruvate kinase isozyme G, chloroplast (Fragment).        |
| Os07g0448800 | 1.255 | 531  | 5  | 18.3 | Aquaporin.                                                           |
| Os05g0474400 | 1.253 | 197  | 2  | 10.9 | Prenylated rab acceptor PRA1 family protein.                         |
| Os03g0379100 | 1.252 | 176  | 3  | 6.9  | DUF248, methyltransferase putative family protein.                   |

|              |       |      |    |      |                                                              |
|--------------|-------|------|----|------|--------------------------------------------------------------|
| Os06g0289900 | 1.252 | 1006 | 9  | 23.9 | UDP-glucuronosyl/UDP-glucosyltransferase family protein.     |
| Os01g0906200 | 1.251 | 152  | 4  | 13   | Similar to heat-intolerant 1.                                |
| Os11g0210500 | 1.25  | 1940 | 6  | 39.8 | Similar to Alcohol dehydrogenase.                            |
| Os07g0570300 | 1.248 | 333  | 10 | 16.3 | Peptidase M16, core domain containing protein.               |
| Os03g0355600 | 1.248 | 333  | 11 | 13.7 | Similar to Adapter-related protein complex 2 beta 1 subunit. |
| Os02g0787300 | 1.248 | 181  | 5  | 18.7 | Similar to MAP kinase kinase.                                |
| Os03g0226200 | 1.246 | 702  | 3  | 48.5 | Non-symbiotic hemoglobin 2 (rHb2) (ORYsa GLB1b).             |
| Os01g0152300 | 1.245 | 737  | 3  | 22.9 | Similar to Histone H2B.1.                                    |
| Os03g0267000 | 1.242 | 301  | 2  | 41   | Low molecular mass heat shock protein Oshsp18.0.             |
| Os01g0294700 | 1.239 | 707  | 8  | 33.7 | Haem peroxidase, plant/fungal/bacterial family protein.      |
| Os08g0558600 | 1.238 | 105  | 3  | 19.1 | Synaptobrevin domain containing protein.                     |
| Os01g0233000 | 1.237 | 391  | 5  | 34.3 | DREPP plasma membrane polypeptide family protein.            |
| Os05g0103500 | 1.235 | 211  | 1  | 7.2  | CHCH domain containing protein.                              |
| Os03g0341100 | 1.234 | 506  | 4  | 28.3 | Similar to 60S ribosomal protein L18.                        |
| Os07g0662900 | 1.233 | 1172 | 17 | 25.3 | Similar to 4-alpha-glucanotransferase.                       |
| Os09g0487500 | 1.233 | 120  | 1  | 12.8 | Conserved hypothetical protein.                              |
| Os08g0562500 | 1.229 | 313  | 6  | 16.4 | Transferase family protein.                                  |
| Os03g0356484 | 1.226 | 150  | 1  | 12.1 | Tetratricopeptide-like helical domain containing protein.    |
| Os04g0441900 | 1.225 | 114  | 3  | 6.5  | Cleft lip and palate transmembrane 1 family protein.         |
| Os12g0605800 | 1.225 | 86   | 5  | 8.4  | Similar to 3-methylcrotonyl CoA carboxylase.                 |
| Os03g0577000 | 1.222 | 1613 | 6  | 45.6 | Similar to Ribosomal protein S3 (Fragment).                  |
| Os01g0822900 | 1.222 | 1233 | 3  | 23.3 | Similar to Lipid transfer protein.                           |
| Os04g0643100 | 1.221 | 192  | 4  | 15.6 | Similar to Vacuolar ATP synthase subunit D.                  |
| Os11g0256050 | 1.221 | 177  | 4  | 22.1 | Hypothetical conserved gene.                                 |
| Os05g0512600 | 1.221 | 365  | 2  | 15.4 | X8 domain containing protein.                                |
| Os02g0797700 | 1.221 | 396  | 5  | 10.1 | Nonaspanin (TM9SF) family protein.                           |

|              |       |      |   |      |                                                              |
|--------------|-------|------|---|------|--------------------------------------------------------------|
| Os07g0180900 | 1.218 | 6901 | 9 | 40.7 | Similar to 60S ribosomal protein L4.                         |
| Os02g0105500 | 1.218 | 502  | 4 | 18.6 | IQ calmodulin-binding region domain containing protein.      |
| Os04g0432000 | 1.217 | 374  | 7 | 26.2 | Serine/threonine-protein kinase SAPK7.                       |
| Os02g0753300 | 1.212 | 1514 | 4 | 26.9 | Lipoxygenase, LH2 domain containing protein.                 |
| Os07g0599000 | 1.206 | 218  | 8 | 14.3 | Pentatricopeptide repeat domain containing protein.          |
| Os05g0302700 | 1.206 | 1264 | 5 | 21.8 | Similar to ATP/ADP carrier protein.                          |
| Os09g0298200 | 1.204 | 654  | 4 | 22.8 | Similar to Brittle 2. >Os09t0298200-02 Similar to Brittle 2. |
| Os06g0103300 | 1.203 | 370  | 3 | 9.1  | Similar to Homogentisate 1,2-dioxygenase.                    |

**Supplementary Table 3.** List of proteins down-regulated in embryos of germinated rice seeds of mutant *d61-1* by iTRAQ

| Gene ID      | NIP(BRZ / Mock)<br>fold change | Protein<br>score | Unique<br>Peptide | Sequence<br>coverage(%) | Description                                                           |
|--------------|--------------------------------|------------------|-------------------|-------------------------|-----------------------------------------------------------------------|
| Os04g0308400 | 0.186                          | 82               | 1                 | 5.5                     | Similar to H0211A12.13 protein.                                       |
| Os03g0266300 | 0.259                          | 675              | 2                 | 36.6                    | Class I low-molecular-weight heat shock protein 17.9.                 |
| Os01g0127600 | 0.276                          | 222              | 2                 | 15.1                    | Similar to Bowman-Birk type proteinase inhibitor D-II precursor (IV). |
| Os02g0268100 | 0.305                          | 4353             | 16                | 60                      | Similar to Glutelin (Fragment).                                       |
| Os01g0159600 | 0.321                          | 2093             | 3                 | 29                      | Small hydrophilic plant seed protein family protein.                  |
| Os07g0214300 | 0.321                          | 1815             | 2                 | 28.3                    | Seed allergenic protein RAG2 precursor.                               |
| Os01g0136000 | 0.332                          | 197              | 2                 | 40.3                    | Similar to Cytosolic class I small heat-shock protein HSP17.5.        |
| Os02g0242600 | 0.351                          | 1274             | 7                 | 21.8                    | Similar to Glutelin.                                                  |
| Os09g0408000 | 0.356                          | 118              | 3                 | 7.8                     | Similar to transducin family protein.                                 |
| Os05g0268500 | 0.369                          | 131              | 5                 | 12                      | Similar to Serine carboxypeptidase 2.                                 |
| Os05g0349800 | 0.375                          | 720              | 3                 | 24.2                    | Embryonic abundant protein 1.                                         |
| Os03g0796000 | 0.379                          | 218              | 2                 | 12.6                    | Similar to Ripening-associated protein (Fragment).                    |

|              |       |      |    |      |                                                                 |
|--------------|-------|------|----|------|-----------------------------------------------------------------|
| Os08g0320100 | 0.38  | 206  | 4  | 12.9 | Nucleotide-binding, alpha-beta plait domain containing protein. |
| Os07g0214600 | 0.383 | 606  | 3  | 25.5 | Similar to Seed allergenic protein RA17 precursor.              |
| Os04g0395700 | 0.389 | 121  | 1  | 7.5  | Conserved hypothetical protein.                                 |
| Os07g0213800 | 0.392 | 507  | 5  | 37.5 | Similar to Allergenic protein.                                  |
| Os09g0127700 | 0.4   | 221  | 2  | 21.5 | Conserved hypothetical protein.                                 |
| Os02g0249000 | 0.411 | 804  | 10 | 22.7 | Glutelin, Seed strage protein                                   |
| Os02g0453600 | 0.414 | 539  | 5  | 28.1 | Similar to Glutelin.                                            |
| Os05g0329100 | 0.421 | 917  | 3  | 42.7 | Prolamin.                                                       |
| Os02g0175800 | 0.428 | 93   | 4  | 34.7 | Similar to fiber protein Fb15.                                  |
| Os03g0804200 | 0.429 | 186  | 3  | 22.1 | Bifunctional inhibitor/plant lipid transfer protein.            |
| Os01g0828100 | 0.44  | 130  | 2  | 9.5  | Similar to Cinnamoyl-CoA reductase.                             |
| Os01g0975900 | 0.445 | 74   | 1  | 6.3  | Similar to Tonoplast membrane integral protein ZmTIP1-2.        |
| Os02g0249800 | 0.45  | 3900 | 2  | 36.3 | Glutelin precursor.                                             |
| Os06g0625400 | 0.466 | 86   | 3  | 5.1  | Similar to Metalloendopeptidase.                                |
| Os04g0434400 | 0.469 | 348  | 4  | 10.3 | Similar to H0823A09.7 protein.                                  |
| Os09g0109600 | 0.471 | 167  | 2  | 40   | Conserved hypothetical protein.                                 |
| Os10g0349400 | 0.473 | 104  | 1  | 9.5  | Similar to cortical cell-delineating protein.                   |
| Os09g0324000 | 0.473 | 181  | 2  | 22.2 | Similar to Oleosin.                                             |
| Os01g0136100 | 0.479 | 1226 | 2  | 40   | 16.9 kDa class I heat shock protein 1.                          |
| Os05g0113400 | 0.481 | 150  | 2  | 20.3 | Similar to Actin-depolymerizing factor 2 (ADF 2).               |
| Os05g0477900 | 0.494 | 811  | 1  | 16.9 | Similar to nonspecific lipid-transfer protein.                  |
| Os04g0593400 | 0.506 | 94   | 1  | 9.3  | Similar to OSIGBa0142102-OSIGBa0101B20.20 protein.              |
| Os01g0225600 | 0.506 | 414  | 3  | 30.5 | Similar to Dehydrin.                                            |
| Os01g0705200 | 0.521 | 2326 | 8  | 36.7 | Late embryogenesis abundant protein.                            |
| Os03g0159600 | 0.529 | 1489 | 6  | 49.6 | Similar to Rab28 protein.                                       |
| Os05g0595400 | 0.53  | 545  | 5  | 21.3 | Similar to Nucleoside diphosphate kinase III                    |

|              |       |      |   |      |                                                                        |
|--------------|-------|------|---|------|------------------------------------------------------------------------|
| Os06g0114400 | 0.532 | 235  | 1 | 7.5  | Conserved hypothetical protein.                                        |
| Os08g0473600 | 0.536 | 289  | 3 | 10.1 | Alpha-amylase isozyme 3E precursor.                                    |
| Os02g0611800 | 0.541 | 252  | 2 | 10   | Similar to Hydroxyanthranilate hydroxycinnamoyltransferase 3.          |
| Os02g0123500 | 0.545 | 191  | 6 | 21.9 | Similar to NADPH-dependent mannose 6-phosphate reductase.              |
| Os07g0422100 | 0.551 | 260  | 1 | 9.2  | AWPM-19-like family protein.                                           |
| Os04g0322100 | 0.553 | 308  | 4 | 21   | Protein of unknown function DUF26 domain containing protein.           |
| Os03g0306900 | 0.559 | 121  | 2 | 9    | Haem oxygenase-like, multi-helical domain containing protein.          |
| Os10g0361900 | 0.56  | 1926 | 2 | 31.1 | Lipoxygenase, LH2 domain containing protein.                           |
| Os02g0765600 | 0.561 | 660  | 9 | 32.5 | Alpha-amylase glycoprotein, Degradation of starch granule              |
| Os03g0734200 | 0.566 | 254  | 1 | 17.4 | Conserved hypothetical protein.                                        |
| Os02g0782500 | 0.567 | 149  | 3 | 15.1 | Similar to Small heat stress protein class CIII.                       |
| Os10g0437500 | 0.567 | 1548 | 5 | 38.1 | Rossmann-like alpha/beta sandwich fold domain containing protein.      |
| Os02g0249600 | 0.568 | 3780 | 1 | 34.9 | Similar to Glutelin.                                                   |
| Os05g0341600 | 0.57  | 57   | 2 | 17.9 | Similar to Ras-related protein Rab-21.                                 |
| Os06g0133000 | 0.57  | 495  | 9 | 22.2 | Granule-bound starch synthase I, chloroplast precursor.                |
| Os07g0215500 | 0.57  | 616  | 2 | 25   | Allergenic protein.                                                    |
| Os05g0133100 | 0.571 | 229  | 2 | 9.4  | Similar to PII protein (Fragment).                                     |
| Os01g0228600 | 0.572 | 139  | 2 | 9.8  | Similar to 2-hydroxyacid dehydrogenase (AGR_L_379p).                   |
| Os02g0567800 | 0.573 | 72   | 4 | 13.8 | Alpha/beta hydrolase fold-3 domain containing protein.                 |
| Os07g0557700 | 0.574 | 76   | 2 | 8.7  | Conserved hypothetical protein.                                        |
| Os07g0694500 | 0.574 | 181  | 4 | 8.5  | Similar to PWWP domain containing protein.                             |
| Os04g0404400 | 0.577 | 841  | 7 | 31.1 | Similar to H0502B11.4 protein.                                         |
| Os01g0666800 | 0.583 | 223  | 4 | 5.8  | Similar to predicted protein.                                          |
| Os10g0416800 | 0.583 | 120  | 4 | 20.8 | Similar to Chitinase 2 (EC 3.2.1.14) (Tulip bulb chitinase-2) (TBC-2). |
| Os04g0445100 | 0.586 | 460  | 4 | 25.1 | Similar to 22.7 kDa class IV heat shock protein precursor.             |
| Os11g0620300 | 0.589 | 254  | 3 | 30.9 | Similar to Nonspecific lipid-transfer protein 2 (LTP 2).               |

|              |       |      |    |      |                                                                |
|--------------|-------|------|----|------|----------------------------------------------------------------|
| Os07g0237100 | 0.59  | 121  | 2  | 8.5  | RNA recognition motif domain domain containing protein.        |
| Os03g0842900 | 0.592 | 1047 | 13 | 43.9 | Similar to Steroleosin-B.                                      |
| Os10g0177200 | 0.594 | 221  | 5  | 14.5 | EF-HAND 2 domain containing protein.                           |
| Os02g0589400 | 0.599 | 78   | 3  | 11.1 | UDP-glucuronosyl/UDP-glucosyltransferase family protein.       |
| Os11g0213600 | 0.6   | 180  | 5  | 11.6 | Peptidase S10, serine carboxypeptidase family protein.         |
| Os06g0704600 | 0.601 | 284  | 7  | 19.7 | Similar to Delta-aminolevulinic acid dehydratase (Fragment).   |
| Os07g0644000 | 0.603 | 128  | 3  | 12.8 | ATP12, ATPase F1F0-assembly protein domain containing protein. |
| Os03g0219300 | 0.603 | 1691 | 2  | 35   | Similar to Tubulin alpha-2 chain (Alpha-2 tubulin).            |
| Os04g0473150 | 0.604 | 703  | 2  | 22.2 | Similar to photosystem II protein D1.                          |
| Os05g0453700 | 0.607 | 353  | 6  | 59.4 | Similar to ENOD18 protein (Fragment).                          |
| Os04g0486950 | 0.608 | 721  | 11 | 26.3 | Similar to Malate synthase.                                    |
| Os01g0119100 | 0.608 | 58   | 3  | 5.9  | Similar to Glycosyltransferase.                                |
| Os06g0705400 | 0.609 | 205  | 1  | 11.7 | Similar to Nonspecific lipid-transfer protein 2P (LTP2P).      |
| Os03g0267000 | 0.613 | 301  | 2  | 41   | Low molecular mass heat shock protein Oshsp18.0.               |
| Os04g0676100 | 0.613 | 79   | 2  | 13.9 | Similar to Thioredoxin X, chloroplast precursor.               |
| Os05g0468800 | 0.615 | 616  | 4  | 31.1 | Phosphatidylethanolamine-binding protein PEBP domain protein.  |
| Os03g0689300 | 0.615 | 1666 | 4  | 21.4 | Plasma membrane H <sup>+</sup> ATPase (EC 3.6.3.6) (H-ATPase). |
| Os10g0491000 | 0.616 | 124  | 2  | 9.2  | Plant Basic Secretory Protein family protein.                  |
| Os02g0158900 | 0.626 | 244  | 6  | 18.8 | Similar to SNF4.                                               |
| Os01g0907600 | 0.628 | 290  | 4  | 13.7 | Cysteine endopeptidase.                                        |
| Os04g0118400 | 0.628 | 7065 | 1  | 51.2 | Similar to Elongation factor EF-2 (Fragment).                  |
| Os01g0210500 | 0.633 | 1133 | 6  | 45   | Similar to SOUL-like protein.                                  |
| Os04g0629500 | 0.635 | 143  | 1  | 6.8  | Similar to Thioredoxin h.                                      |
| Os01g0598600 | 0.636 | 654  | 9  | 32.6 | Peptidase A1 domain containing protein.                        |
| Os03g0605300 | 0.639 | 135  | 3  | 5.2  | Similar to Subtilisin-like protease (Fragment).                |
| Os12g0125400 | 0.644 | 667  | 2  | 25.3 | Similar to Homoserine dehydrogenase-like protein.              |

|              |       |      |    |      |                                                                  |
|--------------|-------|------|----|------|------------------------------------------------------------------|
| Os07g0485100 | 0.652 | 195  | 3  | 11.4 | Similar to Beta-ureidopropionase (Beta-alanine synthase).        |
| Os01g0111600 | 0.653 | 230  | 3  | 20.7 | Similar to MOTHER of FT and TF1 protein.                         |
| Os03g0663400 | 0.654 | 64   | 2  | 10.8 | Similar to Thaumatin-like protein.                               |
| Os03g0130300 | 0.656 | 122  | 2  | 27.2 | Similar to Cp-thionin.                                           |
| Os10g0191300 | 0.66  | 151  | 2  | 18.2 | Similar to PR-1a pathogenesis related protein (Hv-1a) precursor. |
| Os12g0430000 | 0.662 | 414  | 5  | 10.2 | Hypothetical conserved gene.                                     |
| Os03g0134900 | 0.664 | 119  | 5  | 17.6 | Similar to Glutathione S-transferase GSTF14 (Fragment).          |
| Os03g0381500 | 0.667 | 637  | 2  | 17.1 | Conserved hypothetical protein.                                  |
| Os06g0246500 | 0.668 | 494  | 8  | 30.4 | Similar to Pyruvate dehydrogenase E1 alpha subunit.              |
| Os12g0178200 | 0.668 | 266  | 2  | 24.1 | Similar to Thylakoid-bound ascorbate peroxidase (Fragment).      |
| Os04g0513100 | 0.668 | 273  | 2  | 6.2  | Similar to Beta-glucosidase.                                     |
| Os01g0613300 | 0.668 | 97   | 3  | 19.2 | Conserved hypothetical protein CHP02058 domain protein.          |
| Os04g0390800 | 0.669 | 2520 | 16 | 54.8 | NAD(P)-binding domain containing protein.                        |
| Os04g0661600 | 0.675 | 357  | 6  | 22.7 | Similar to H0112G12.13 protein.                                  |
| Os04g0674700 | 0.675 | 184  | 3  | 7.3  | Similar to AMP-binding protein.                                  |
| Os06g0134800 | 0.676 | 635  | 6  | 20.7 | Folate-binding, YgfZ domain containing protein.                  |
| Os06g0726400 | 0.678 | 591  | 12 | 15.7 | Branching enzyme-I precursor (Starch-branching enzyme I).        |
| Os12g0626500 | 0.679 | 1531 | 3  | 26.8 | Similar to late embryogenesis abundant protein D-34.             |
| Os01g0651800 | 0.679 | 209  | 3  | 10   | Lipase, class 3 family protein.                                  |
| Os03g0804700 | 0.679 | 158  | 2  | 12.4 | Germin-like protein 3-8.                                         |
| Os03g0411300 | 0.679 | 427  | 1  | 7    | EF-Hand type domain containing protein.                          |
| Os12g0555500 | 0.682 | 986  | 9  | 60.1 | Probenazole-inducible protein PBZ1.                              |
| Os04g0685200 | 0.682 | 753  | 7  | 32.1 | Peptidase aspartic, catalytic domain containing protein.         |
| Os02g0595500 | 0.683 | 862  | 5  | 34.4 | Similar to NAD-dependent isocitrate dehydrogenase precursor.     |
| Os04g0526600 | 0.684 | 1430 | 7  | 41.5 | Similar to Alpha-amylase/subtilisin inhibitor (RASI).            |
| Os07g0468100 | 0.684 | 655  | 7  | 34.5 | Similar to Glutathione S-transferase GST 19.                     |



|              |       |      |    |      |                                                                       |
|--------------|-------|------|----|------|-----------------------------------------------------------------------|
| Os09g0535000 | 0.686 | 1153 | 10 | 46.1 | Similar to Triosephosphate isomerase, chloroplast precursor.          |
| Os08g0549300 | 0.687 | 403  | 1  | 10.9 | Similar to Acyl carrier protein III, chloroplast precursor (ACP III). |
| Os04g0665800 | 0.689 | 370  | 3  | 14   | Similar to H1005F08.12 protein.                                       |
| Os04g0127300 | 0.691 | 99   | 6  | 14.9 | Peptidase S8 and S53, subtilisin, kexin, sedolisin domain protein.    |
| Os02g0204000 | 0.692 | 92   | 2  | 10.7 | Tetratricopeptide-like helical domain containing protein.             |
| Os11g0149200 | 0.692 | 201  | 1  | 7.5  | Conserved hypothetical protein.                                       |
| Os06g0625500 | 0.693 | 3443 | 7  | 43.5 | Similar to Thioredoxin peroxidase.                                    |
| Os08g0345800 | 0.695 | 289  | 5  | 22.5 | Similar to Glucose-1-phosphate adenylyltransferase small subunit.     |
| Os03g0113700 | 0.696 | 2358 | 3  | 24.9 | Similar to Heat shock 70 kDa protein, mitochondrial precursor.        |
| Os01g0921600 | 0.697 | 648  | 6  | 40.1 | Similar to Mitochondrial import receptor subunit TOM20.               |
| Os11g0568500 | 0.698 | 211  | 3  | 36.1 | Prefoldin domain containing protein.                                  |
| Os09g0514600 | 0.7   | 521  | 4  | 23.4 | Beta-grasp fold, ferredoxin-type domain containing protein.           |
| Os04g0679400 | 0.701 | 341  | 7  | 41.9 | Similar to H0801D08.15 protein.                                       |
| Os03g0659300 | 0.702 | 1909 | 5  | 46.1 | Glyoxalase/bleomycin resistance protein/dioxygenase.                  |
| Os03g0790900 | 0.703 | 1130 | 18 | 20.4 | Similar to Aldehyde oxidase-2.                                        |
| Os03g0141200 | 0.704 | 147  | 6  | 16   | Similar to Beta-amylase PCT-BMYI.                                     |
| Os05g0457700 | 0.705 | 186  | 4  | 15.9 | Tetratricopeptide-like helical domain containing protein.             |
| Os09g0568900 | 0.706 | 271  | 1  | 23.2 | Similar to predicted protein.                                         |
| Os11g0701100 | 0.708 | 174  | 4  | 21   | Similar to Class III chitinase homologue (OsChib3H-h) (Fragment).     |
| Os06g0714100 | 0.71  | 346  | 5  | 53.1 | Complex 1 LYR protein family protein.                                 |
| Os10g0406600 | 0.712 | 513  | 4  | 47.8 | Complex 1 LYR protein family protein.                                 |
| Os07g0159800 | 0.714 | 296  | 1  | 8.6  | MD-2-related lipid-recognition domain containing protein.             |
| Os05g0358400 | 0.715 | 115  | 3  | 11.4 | Butirosin biosynthesis, BtrG-like domain containing protein.          |
| Os09g0539500 | 0.716 | 784  | 3  | 36.6 | Similar to SKP1-like protein 1A.                                      |
| Os06g0105400 | 0.717 | 309  | 3  | 17.5 | Similar to dihydrolipoamide S-acetyltransferase.                      |
| Os04g0543900 | 0.719 | 404  | 5  | 21.4 | Similar to Glutamate dehydrogenase 2.                                 |

|              |       |       |    |      |                                                                      |
|--------------|-------|-------|----|------|----------------------------------------------------------------------|
| Os06g0498400 | 0.723 | 884   | 21 | 18.5 | Similar to Alpha-glucan water dikinase, chloroplast precursor.       |
| Os06g0325500 | 0.725 | 233   | 4  | 10.4 | Uncharacterised conserved protein UCP030210.                         |
| Os09g0441400 | 0.725 | 97    | 4  | 8.4  | Similar to Elicitor-inducible cytochrome P450.                       |
| Os11g0250000 | 0.726 | 268   | 3  | 20.2 | Similar to RNA recognition motif family protein, expressed.          |
| Os07g0639800 | 0.728 | 392   | 5  | 31.8 | Similar to Eukaryotic translation initiation factor 6 (Fragment).    |
| Os08g0338700 | 0.728 | 711   | 4  | 24.1 | Similar to Chaperone GrpE type 2.                                    |
| Os02g0664200 | 0.732 | 76    | 3  | 9.9  | Similar to UDP-glucose:glycoprotein glucosyltransferase 1 precursor. |
| Os05g0557200 | 0.733 | 758   | 9  | 23.2 | Armadillo-type fold domain containing protein.                       |
| Os11g0115400 | 0.734 | 379   | 2  | 25.9 | Lipid transfer protein LPT IV.                                       |
| Os03g0210600 | 0.734 | 266   | 5  | 24.3 | Conserved hypothetical protein.                                      |
| Os04g0497000 | 0.734 | 52    | 3  | 11.3 | Similar to Allyl alcohol dehydrogenase.                              |
| Os09g0382500 | 0.737 | 112   | 2  | 12.2 | Conserved hypothetical protein.                                      |
| Os03g0295500 | 0.737 | 93    | 1  | 12.7 | CHCH domain containing protein.                                      |
| Os05g0399300 | 0.738 | 290   | 3  | 24.2 | Similar to Chitinase.                                                |
| Os03g0197400 | 0.739 | 475   | 5  | 17.8 | Similar to COP9 signalosome complex subunit 4.                       |
| Os03g0101600 | 0.74  | 879   | 10 | 37.7 | Similar to Oxidoreductase, zinc-binding dehydrogenase protein.       |
| Os09g0516200 | 0.742 | 418   | 3  | 7.1  | Similar to Transcription factor RF2a.                                |
| Os03g0405100 | 0.743 | 467   | 6  | 22.9 | Ubiquinone biosynthesis protein COQ9 domain containing protein.      |
| Os10g0320400 | 0.743 | 942   | 8  | 28.1 | Similar to ATP synthase gamma chain, mitochondrial precursor.        |
| Os05g0460000 | 0.743 | 12574 | 2  | 46.3 | Similar to 70 kDa heat shock cognate protein 1.                      |
| Os03g0735300 | 0.745 | 496   | 6  | 23.3 | Alba, DNA/RNA-binding protein family protein.                        |
| Os07g0104500 | 0.746 | 383   | 5  | 16.1 | Haem peroxidase, plant/fungal/bacterial family protein.              |
| Os03g0277500 | 0.747 | 2863  | 6  | 56.2 | Similar to Glyoxalase family protein, expressed.                     |
| Os07g0213600 | 0.747 | 238   | 2  | 24.7 | Bifunctional inhibitor/plant lipid transfer protein.                 |
| Os03g0655700 | 0.747 | 516   | 8  | 33.3 | Similar to 3-isopropylmalate dehydrogenase 2.                        |
| Os01g0918200 | 0.748 | 297   | 1  | 20.8 | Similar to Ubiquitin-like protein SMT3.                              |

|              |       |      |    |      |                                                                    |
|--------------|-------|------|----|------|--------------------------------------------------------------------|
| Os03g0820500 | 0.749 | 1206 | 3  | 34.7 | Similar to WCOR719.                                                |
| Os02g0595700 | 0.75  | 719  | 9  | 25.5 | Chloroplast translational elongation factor Tu.                    |
| Os03g0426900 | 0.751 | 1281 | 16 | 25.3 | Similar to Heat shock protein 101.                                 |
| Os01g0811100 | 0.753 | 133  | 4  | 21.3 | Proteasome subunit alpha type 3.                                   |
| Os10g0155500 | 0.754 | 357  | 8  | 27.9 | Similar to Aldose 1-epimerase-like protein.                        |
| Os05g0561500 | 0.754 | 294  | 4  | 24.9 | Similar to CMP-KDO synthetase (Fragment).                          |
| Os08g0430700 | 0.754 | 1046 | 5  | 20.8 | Similar to UVB-resistance protein-like.                            |
| Os01g0351300 | 0.756 | 175  | 8  | 13.5 | Exocyst complex subunit Sec15-like family protein.                 |
| Os06g0215600 | 0.756 | 271  | 3  | 13.1 | Similar to Oxo-phytyldienoic acid reductase.                       |
| Os10g0411700 | 0.758 | 464  | 1  | 16.9 | Similar to S28 ribosomal protein (Fragment).                       |
| Os06g0584200 | 0.758 | 183  | 4  | 7.7  | N-6 adenine-specific DNA methylase, conserved site domain protein. |
| Os09g0133200 | 0.759 | 154  | 5  | 23.3 | Similar to Dehydrogenase/reductase SDR family member 4.            |
| Os04g0117900 | 0.76  | 1097 | 5  | 27.6 | Amidase family protein.                                            |
| Os08g0250200 | 0.761 | 287  | 2  | 42   | ATPase, F1 complex, epsilon subunit, mitochondrial family protein. |
| Os01g0531500 | 0.761 | 2211 | 6  | 33.1 | Dienelactone hydrolase domain containing protein.                  |
| Os02g0282100 | 0.761 | 65   | 2  | 17.4 | Conserved hypothetical protein.                                    |
| Os04g0479200 | 0.762 | 254  | 3  | 23.9 | Similar to NAD-dependent isocitrate dehydrogenase c;1.             |
| Os02g0715400 | 0.767 | 349  | 2  | 32.7 | Conserved hypothetical protein.                                    |
| Os06g0114500 | 0.769 | 489  | 1  | 16.5 | Similar to ATOZI1 protein (Stress-induced protein OZI1).           |
| Os02g0276400 | 0.77  | 117  | 2  | 11.9 | Similar to Isochorismatase family protein rutB.                    |
| Os09g0315700 | 0.771 | 1265 | 11 | 27.5 | Phosphoenolpyruvate carboxylase family protein.                    |
| Os04g0338000 | 0.771 | 457  | 12 | 35.3 | Similar to IN2-2 protein.                                          |
| Os07g0195400 | 0.771 | 496  | 9  | 23.7 | Phosphoacetylglucosamine mutase domain containing protein.         |
| Os09g0548200 | 0.772 | 672  | 2  | 8.6  | Peptidoglycan-binding Lysin subgroup domain containing protein.    |
| Os04g0390700 | 0.773 | 1162 | 11 | 38.3 | Short-chain dehydrogenase/reductase SDR domain protein.            |
| Os05g0100800 | 0.773 | 215  | 1  | 8.2  | Nucleic acid-binding, OB-fold domain containing protein.           |

|              |       |      |    |      |                                                                    |
|--------------|-------|------|----|------|--------------------------------------------------------------------|
| Os01g0763300 | 0.773 | 189  | 5  | 58.4 | Conserved hypothetical protein.                                    |
| Os07g0640100 | 0.773 | 478  | 3  | 20.6 | Complex 1 LYR protein family protein.                              |
| Os03g0337800 | 0.775 | 356  | 2  | 24   | Similar to 60S ribosomal protein L19 (Fragment).                   |
| Os01g0626300 | 0.775 | 212  | 3  | 61.2 | Similar to Mitochondrial import receptor subunit TOM7-1.           |
| Os03g0761000 | 0.777 | 619  | 3  | 22.9 | SWIB/MDM2 domain containing protein.                               |
| Os01g0753100 | 0.777 | 614  | 8  | 31.5 | Alcohol dehydrogenase superfamily, zinc-containing protein.        |
| Os03g0707900 | 0.778 | 60   | 3  | 6.3  | Similar to Toc64.                                                  |
| Os12g0620400 | 0.778 | 644  | 4  | 24.4 | Methyl-CpG DNA binding domain containing protein.                  |
| Os02g0741500 | 0.778 | 243  | 5  | 14.2 | Ribbon-helix-helix domain containing protein.                      |
| Os09g0460400 | 0.778 | 140  | 4  | 18.4 | Alpha/beta hydrolase fold-3 domain containing protein.             |
| Os03g0839100 | 0.779 | 181  | 6  | 13.7 | Ubiquinone biosynthesis hydroxylase.                               |
| Os03g0295800 | 0.78  | 634  | 2  | 10.9 | Gamma interferon inducible lysosomal thiol reductase GILT protein. |
| Os03g0385400 | 0.781 | 882  | 4  | 30.3 | Bifunctional inhibitor/plant lipid transfer protein.               |
| Os06g0675700 | 0.781 | 831  | 4  | 18   | Similar to High pI alpha-glucosidase.                              |
| Os01g0939700 | 0.783 | 468  | 7  | 28.1 | Similar to Esterase D.                                             |
| Os04g0480100 | 0.783 | 486  | 8  | 22.4 | Eukaryotic translation initiation factor 4B.                       |
| Os05g0405000 | 0.783 | 1494 | 14 | 22.5 | Orthophosphate dikinase precursor.                                 |
| Os01g0558300 | 0.784 | 168  | 3  | 13.4 | RWD domain containing protein.                                     |
| Os04g0310500 | 0.784 | 445  | 4  | 47.5 | NADH dehydrogenase (complex I).                                    |
| Os02g0173900 | 0.785 | 937  | 4  | 20.6 | Similar to SSADH.                                                  |
| Os03g0218500 | 0.786 | 614  | 9  | 24.9 | Similar to 70kD heat shock protein.                                |
| Os04g0173800 | 0.786 | 2913 | 4  | 33.9 | Lectin precursor (Agglutinin).                                     |
| Os05g0209600 | 0.786 | 278  | 6  | 20.8 | Similar to Esterase.                                               |
| Os07g0205000 | 0.786 | 341  | 4  | 28   | Similar to Cytochrome-C reductase 14 kDa subunit (Fragment).       |
| Os05g0508500 | 0.787 | 857  | 3  | 35.5 | Similar to Thioredoxin H.                                          |
| Os03g0212700 | 0.787 | 1795 | 11 | 28.7 | Similar to Cytochrome C reductase-processing peptidase subunit I.  |

|              |       |      |    |      |                                                                   |
|--------------|-------|------|----|------|-------------------------------------------------------------------|
| Os09g0474300 | 0.787 | 466  | 4  | 24.9 | Similar to Heat-shock protein precursor.                          |
| Os06g0103300 | 0.788 | 370  | 3  | 9.1  | Similar to Homogentisate 1,2-dioxygenase.                         |
| Os04g0527900 | 0.789 | 384  | 3  | 12.1 | Similar to Tonoplast membrane integral protein ZmTIP3-2.          |
| Os03g0332400 | 0.79  | 362  | 4  | 17.4 | Similar to Hydroxyacylglutathione hydrolase cytoplasmic (Glx II). |
| Os12g0512800 | 0.791 | 100  | 5  | 10.5 | Cytochrome P450 71E1.                                             |
| Os12g0230100 | 0.793 | 860  | 10 | 25.4 | Similar to ATP-dependent Clp protease ATP-binding subunit clpA.   |
| Os10g0492101 | 0.794 | 243  | 2  | 17.7 | Hypothetical conserved gene.                                      |
| Os02g0611400 | 0.794 | 566  | 8  | 16.5 | Pentatricopeptide repeat domain containing protein.               |
| Os04g0482000 | 0.794 | 123  | 3  | 17.1 | Similar to Peptide methionine sulfoxide reductase.                |
| Os03g0233900 | 0.795 | 345  | 3  | 41.6 | Non-symbiotic hemoglobin 1 (rHb1) (ORYsa GLB1a).                  |
| Os12g0616200 | 0.797 | 233  | 3  | 17.1 | HUELLENLOS-like protein.                                          |
| Os08g0151800 | 0.797 | 601  | 7  | 19.1 | FAD-dependent pyridine nucleotide-disulphide oxidoreductase.      |
| Os02g0706500 | 0.797 | 175  | 3  | 9.4  | ATPase, AAA-type, core domain containing protein.                 |
| Os01g0266600 | 0.798 | 320  | 4  | 33.3 | Thioredoxin fold domain containing protein.                       |
| Os03g0758400 | 0.799 | 234  | 3  | 15.1 | Ankyrin repeat containing protein.                                |
| Os06g0320000 | 0.8   | 127  | 3  | 30.2 | Thioredoxin fold domain containing protein.                       |
| Os10g0447100 | 0.8   | 60   | 1  | 6.9  | Similar to Ubiquitin-conjugating enzyme E2-21 kDa 2.              |
| Os01g0184100 | 0.801 | 1411 | 4  | 30.7 | Similar to 17.5 kDa class II heat shock protein.                  |
| Os04g0106300 | 0.801 | 534  | 7  | 29.4 | Similar to Arginase.                                              |
| Os10g0415600 | 0.804 | 510  | 8  | 12.1 | Similar to Prolyl oligopeptidase family protein.                  |
| Os03g0313000 | 0.804 | 450  | 5  | 31.2 | Similar to NADH-ubiquinone oxidoreductase (Fragment).             |
| Os01g0168100 | 0.804 | 134  | 5  | 15.3 | KIP1-like domain containing protein.                              |
| Os07g0617800 | 0.804 | 1298 | 10 | 39.2 | Similar to Alanine aminotransferase.                              |
| Os05g0519700 | 0.805 | 8328 | 26 | 43.6 | Heat shock protein 101.                                           |
| Os03g0854400 | 0.805 | 987  | 4  | 32   | Ribonuclease III domain containing protein.                       |
| Os10g0411800 | 0.806 | 4046 | 5  | 56   | Similar to 40S ribosomal protein S17-3.                           |

|              |       |      |    |      |                                                                |
|--------------|-------|------|----|------|----------------------------------------------------------------|
| Os05g0303000 | 0.807 | 642  | 8  | 25.5 | Similar to Chloroplast heat shock protein 70.                  |
| Os03g0390400 | 0.807 | 539  | 4  | 39.1 | Similar to Cytochrome c oxidase subunit 6b.                    |
| Os02g0162500 | 0.808 | 2708 | 5  | 38.7 | Similar to 40S ribosomal protein S14.                          |
| Os05g0584200 | 0.808 | 375  | 3  | 26.5 | Similar to Late embryogenesis abundant protein Lea14-A.        |
| Os03g0712700 | 0.809 | 4568 | 21 | 48.5 | Similar to Phosphoglucomutase, cytoplasmic 2.                  |
| Os08g0536000 | 0.809 | 711  | 6  | 25.1 | Similar to Pyruvate dehydrogenase E1 beta subunit isoform 1.   |
| Os06g0214850 | 0.81  | 437  | 12 | 47.7 | Similar to gibberellin receptor GID1L2.                        |
| Os05g0155300 | 0.81  | 305  | 4  | 18.4 | Similar to HIRA interacting protein 5.                         |
| Os02g0188000 | 0.813 | 545  | 3  | 10.5 | UDP-glucuronosyl/UDP-glucosyltransferase family protein.       |
| Os02g0143100 | 0.813 | 769  | 7  | 23.9 | Similar to Sucrose-phosphatase.                                |
| Os07g0639000 | 0.813 | 2153 | 8  | 48   | Similar to Class III peroxidase 46.                            |
| Os01g0665400 | 0.814 | 185  | 3  | 10.6 | Ribokinase family protein.                                     |
| Os09g0338400 | 0.815 | 515  | 8  | 26.2 | Similar to Cysteine desulfurase, mitochondrial precursor.      |
| Os06g0531200 | 0.815 | 1511 | 13 | 45.4 | ThiJ/Pfpl domain containing protein.                           |
| Os02g0205200 | 0.815 | 495  | 8  | 28.8 | Similar to Unidentified precursor.                             |
| Os09g0123200 | 0.815 | 214  | 4  | 8.7  | Similar to Flowering time control protein isoform OsFCA-1.     |
| Os02g0530600 | 0.815 | 3497 | 26 | 41.3 | Poly(ADP-ribose) polymerase, regulatory region domain protein. |
| Os03g0399800 | 0.816 | 576  | 5  | 41.2 | Mannose-binding lectin domain containing protein.              |
| Os07g0570700 | 0.816 | 109  | 2  | 12.4 | Ribosome recycling factor family protein.                      |
| Os01g0618100 | 0.817 | 374  | 6  | 24.7 | Similar to IN2-2 protein.                                      |
| Os01g0217800 | 0.818 | 323  | 5  | 17.1 | ThiJ/Pfpl domain containing protein.                           |
| Os07g0640200 | 0.82  | 324  | 8  | 19   | Carbohydrate kinase, FGGY family protein.                      |
| Os10g0417600 | 0.821 | 1190 | 8  | 51.1 | NAD(P)-binding domain containing protein.                      |
| Os05g0140500 | 0.821 | 260  | 2  | 17.2 | RNA binding motif protein 8 family protein.                    |
| Os02g0257200 | 0.821 | 497  | 4  | 10.5 | Conserved hypothetical protein.                                |
| Os05g0547850 | 0.823 | 289  | 2  | 16.4 | DNA-binding TFAR19-related protein family protein.             |

|              |       |      |    |      |                                                         |
|--------------|-------|------|----|------|---------------------------------------------------------|
| Os03g0780500 | 0.823 | 665  | 3  | 24.6 | Similar to inosine-5-monophosphate dehydrogenase 2.     |
| Os03g0776000 | 0.823 | 2107 | 2  | 33.7 | Glucose-6-phosphate isomerase, cytosolic A (GPI-A).     |
| Os02g0187100 | 0.823 | 770  | 4  | 21.8 | Similar to cyclase.                                     |
| Os02g0753300 | 0.826 | 1514 | 4  | 26.9 | Lipoxygenase, LH2 domain containing protein.            |
| Os12g0632700 | 0.826 | 1165 | 6  | 20.5 | Malate dehydrogenase, glyoxysomal precursor.            |
| Os04g0650000 | 0.827 | 771  | 4  | 23.5 | Similar to cDNA clone:J013002H09, full insert sequence. |
| Os06g0668200 | 0.827 | 8132 | 11 | 64.1 | Similar to Phosphoglycerate kinase, cytosolic.          |
| Os04g0439900 | 0.828 | 940  | 10 | 31.2 | Similar to Translocon Tic40 precursor.                  |
| Os08g0440800 | 0.832 | 1186 | 10 | 29.7 | Glyceraldehyde-3-phosphate dehydrogenase.               |
| Os01g0849600 | 0.832 | 593  | 7  | 62.3 | Similar to ENOD18 protein (Fragment).                   |
| Os06g0258900 | 0.832 | 766  | 18 | 16.9 | NAD(P)-binding domain containing protein.               |

**Supplementary Table 4.** List of proteins up-regulated in embryos of germinated rice seeds of mutant *db1-1* by iTRAQ

| Gene ID      | NIP(BRZ / Mock)<br>fold change | Protein<br>score | Unique<br>Peptide | Sequence<br>coverage(%) | Description                                                  |
|--------------|--------------------------------|------------------|-------------------|-------------------------|--------------------------------------------------------------|
| Os01g0124650 | 4.341                          | 99               | 1                 | 7.6                     | Hypothetical conserved gene.                                 |
| Os07g0124900 | 2.796                          | 93               | 1                 | 7.8                     | Allergen V5/Tpx-1 related family protein.                    |
| Os01g0695100 | 2.618                          | 144              | 2                 | 49                      | Similar to Phosphoethanolamine N-methyltransferase.          |
| Os10g0528300 | 2.393                          | 136              | 5                 | 23.4                    | Tau class GST protein 4.                                     |
| Os03g0802500 | 2.316                          | 161              | 4                 | 8.1                     | ATPase, AAA-type, core domain containing protein.            |
| Os09g0491772 | 2.314                          | 1982             | 11                | 28.8                    | Similar to Heat shock protein 70 (Hsc70-5).                  |
| Os01g0815800 | 2.224                          | 682              | 1                 | 19.8                    | Similar to 60S ribosomal protein L24-A (L30A) (RP29) (YL21). |
| Os05g0548900 | 2.215                          | 200              | 2                 | 8.7                     | Similar to Phosphoethanolamine methyltransferase.            |

|              |       |      |    |      |                                                                                     |
|--------------|-------|------|----|------|-------------------------------------------------------------------------------------|
| Os02g0704900 | 2.176 | 385  | 2  | 31.3 | Similar to Inorganic pyrophosphatase-like protein.                                  |
| Os02g0804100 | 2.092 | 242  | 1  | 16.1 | Similar to predicted protein.                                                       |
| Os05g0552300 | 2.09  | 777  | 6  | 32.7 | Similar to Guanine nucleotide-binding protein (GPB-LR) (RWD).                       |
| Os04g0623500 | 2.031 | 201  | 3  | 11   | Similar to H0215F08.7 protein.                                                      |
| Os03g0799000 | 2.018 | 126  | 2  | 18.4 | Similar to Histone H1.                                                              |
| Os03g0835800 | 2.004 | 153  | 3  | 11.3 | Hypothetical conserved gene.                                                        |
| Os12g0189300 | 1.93  | 625  | 8  | 28.4 | Pyruvate/Phosphoenolpyruvate kinase.                                                |
| Os10g0361000 | 1.89  | 3750 | 1  | 28.7 | Lipoxygenase, LH2 domain containing protein.                                        |
| Os03g0720300 | 1.884 | 452  | 5  | 26.6 | Similar to Glutamate decarboxylase isozyme 1.                                       |
| Os01g0880800 | 1.835 | 891  | 5  | 16.8 | Similar to Acyl-[acyl-carrier-protein] desaturase.                                  |
| Os03g0350300 | 1.806 | 1061 | 2  | 36.6 | Similar to SAR DNA-binding protein-like protein.                                    |
| Os03g0118800 | 1.8   | 176  | 3  | 12.7 | Similar to Hydroxymethylglutaryl-CoA synthase.                                      |
| Os02g0529700 | 1.792 | 550  | 3  | 61.1 | Similar to Acidic ribosomal protein P2a-4 (Fragment).                               |
| Os07g0207400 | 1.79  | 1876 | 3  | 50.3 | Similar to RF12 protein (Fragment).                                                 |
| Os02g0714200 | 1.781 | 464  | 5  | 23.2 | Similar to Pyrophosphate--fructose 6-phosphate 1-phosphotransferase alpha subunit . |
| Os05g0135700 | 1.769 | 1911 | 4  | 52.3 | S-adenosylmethionine synthetase 1.                                                  |
| Os06g0194900 | 1.756 | 6017 | 21 | 44.3 | Sucrose synthase 2.                                                                 |
| Os11g0602200 | 1.744 | 219  | 3  | 6.4  | Similar to SET domain protein SDG111.                                               |
| Os03g0796501 | 1.728 | 2480 | 5  | 34.2 | Similar to 60S ribosomal protein L4 (L1).                                           |
| Os02g0550100 | 1.726 | 419  | 1  | 10.8 | Similar to Vacuolar ATP synthase 16 kDa proteolipid subunit.                        |
| Os08g0488100 | 1.725 | 117  | 1  | 17.2 | Similar to Cortical cell-delineating protein.                                       |
| Os01g0896700 | 1.701 | 902  | 3  | 34.5 | Similar to 60S ribosomal protein L5.                                                |
| Os02g0735200 | 1.686 | 424  | 5  | 36   | Glutamine synthetase shoot isozyme.                                                 |
| Os06g0611900 | 1.682 | 150  | 6  | 13.6 | Similar to Glycine decarboxylase P subunit.                                         |
| Os10g0571200 | 1.679 | 424  | 6  | 18.8 | Similar to Pyruvate kinase isozyme G, chloroplast (Fragment).                       |



|              |       |      |    |      |                                                                |
|--------------|-------|------|----|------|----------------------------------------------------------------|
| Os06g0168600 | 1.664 | 273  | 6  | 13   | Ribonucleotide reductase, Chloroplast biogenesis               |
| Os10g0112600 | 1.662 | 326  | 2  | 8    | Nonaspanin (TM9SF) family protein.                             |
| Os07g0545400 | 1.654 | 174  | 1  | 23.7 | Protein H2A.                                                   |
| Os12g0625000 | 1.647 | 352  | 3  | 19.6 | Similar to Cysteine synthase.                                  |
| Os06g0614300 | 1.631 | 163  | 3  | 9    | C-CAP/cofactor C-like domain domain containing protein.        |
| Os10g0397400 | 1.622 | 147  | 4  | 19.1 | Similar to Cell elongation protein DIMINUTO.                   |
| Os03g0736300 | 1.621 | 99   | 4  | 6.5  | Similar to CEL6=CELLULASE 6 (Fragment).                        |
| Os02g0675700 | 1.617 | 236  | 4  | 18.4 | DUF248, methyltransferase putative family protein.             |
| Os09g0491100 | 1.604 | 162  | 7  | 17   | Similar to Beta-primeverosidase.                               |
| Os01g0150000 | 1.603 | 136  | 4  | 11.9 | 3-oxo-5-alpha-steroid 4-dehydrogenase.                         |
| Os03g0352300 | 1.603 | 1016 | 10 | 24.3 | Similar to Nucleolar protein.                                  |
| Os03g0237000 | 1.587 | 528  | 6  | 15.3 | Nonaspanin (TM9SF) family protein.                             |
| Os03g0401300 | 1.584 | 7456 | 15 | 42.3 | Sucrose synthase 2.                                            |
| Os11g0210500 | 1.581 | 1940 | 6  | 39.8 | Similar to Alcohol dehydrogenase.                              |
| Os01g0375000 | 1.578 | 78   | 6  | 12.4 | GTP1/OBG domain containing protein.                            |
| Os08g0127900 | 1.576 | 680  | 6  | 12.8 | Similar to Globulin 1 (Fragment).                              |
| Os04g0474800 | 1.565 | 442  | 6  | 28.1 | Similar to Isoform 2 of Beta-glucosidase 12.                   |
| Os08g0104400 | 1.564 | 276  | 2  | 31.2 | Conserved hypothetical protein.                                |
| Os07g0500300 | 1.563 | 303  | 3  | 32.4 | C2 calcium-dependent membrane targeting domain protein.        |
| Os02g0718900 | 1.557 | 1290 | 5  | 26.7 | ADP,ATP carrier protein, mitochondrial precursor.              |
| Os06g0604200 | 1.556 | 732  | 5  | 18.3 | Phospholipase D.                                               |
| Os04g0612600 | 1.555 | 107  | 2  | 11.5 | Similar to Coatomer-like protein, epsilon subunit.             |
| Os01g0348700 | 1.552 | 422  | 3  | 20.4 | Similar to 60S ribosomal protein L23a (L25).                   |
| Os05g0388600 | 1.55  | 157  | 5  | 16.7 | Protein of unknown function DUF3411 domain containing protein. |
| Os05g0503300 | 1.55  | 239  | 9  | 16.8 | Similar to Sulfite reductase (Fragment).                       |
| Os01g0860300 | 1.546 | 655  | 2  | 28.2 | Similar to Ribosomal protein L1.                               |

|              |       |      |    |      |                                                                 |
|--------------|-------|------|----|------|-----------------------------------------------------------------|
| Os12g0443500 | 1.54  | 4492 | 2  | 53.8 | Similar to UDP-glucose 6-dehydrogenase.                         |
| Os03g0700700 | 1.539 | 1028 | 18 | 24.9 | Similar to Lipoxygenase (Fragment).                             |
| Os02g0788800 | 1.528 | 112  | 2  | 8.2  | Similar to amino acid transporter family protein.               |
| Os02g0126700 | 1.528 | 190  | 3  | 36.4 | Similar to Small nuclear ribonucleoprotein homolog.             |
| Os01g0205500 | 1.523 | 1589 | 1  | 33.5 | Similar to 60S ribosomal protein L11-2 (L16). Splice isoform 2. |
| Os01g0166700 | 1.518 | 87   | 1  | 5.3  | Saposin family protein.                                         |
| Os03g0280800 | 1.509 | 140  | 1  | 7.9  | Similar to UDP-D-glucuronate decarboxylase.                     |
| Os11g0168200 | 1.503 | 1855 | 11 | 28   | 60S ribosomal protein L3.                                       |
| Os09g0482100 | 1.502 | 5736 | 2  | 41.3 | Similar to Heat shock protein 82.                               |
| Os07g0638400 | 1.5   | 142  | 5  | 34.5 | Similar to 1-Cys peroxiredoxin.                                 |
| Os02g0285300 | 1.499 | 407  | 3  | 19   | DREPP plasma membrane polypeptide family protein.               |
| Os11g0704600 | 1.498 | 248  | 3  | 9.1  | Similar to Beta-1,3 glucanase precursor.                        |
| Os09g0482400 | 1.495 | 6307 | 2  | 41.3 | Similar to Heat shock protein 81-3.                             |
| Os05g0362500 | 1.494 | 149  | 1  | 11   | Protein of unknown function DUF538 domain containing protein.   |
| Os05g0494000 | 1.492 | 231  | 6  | 13.9 | Similar to Cytochrome P450 98A1.                                |
| Os02g0146600 | 1.487 | 3896 | 3  | 50   | Similar to Eukaryotic initiation factor 4A (eIF4A) (eIF-4A).    |
| Os02g0192500 | 1.485 | 109  | 5  | 10.6 | Similar to Cellulose synthase-like protein (Fragment).          |
| Os03g0130400 | 1.482 | 193  | 4  | 20.8 | Adenylate kinase, subfamily protein.                            |
| Os10g0486900 | 1.477 | 71   | 2  | 9.3  | Tetratricopeptide-like helical domain containing protein.       |
| Os01g0358400 | 1.475 | 2745 | 1  | 43.4 | Similar to 40S ribosomal protein S4.                            |
| Os05g0555800 | 1.474 | 290  | 2  | 37.5 | Similar to 60S ribosomal protein L35a-3.                        |
| Os07g0608700 | 1.474 | 124  | 2  | 32.5 | Similar to small nuclear ribonucleoprotein G.                   |
| Os02g0209000 | 1.473 | 138  | 6  | 10.2 | Hypothetical conserved gene.                                    |
| Os05g0563550 | 1.472 | 382  | 3  | 14.3 | FAS1 domain domain containing protein.                          |
| Os05g0597100 | 1.469 | 301  | 4  | 15.5 | Similar to Nucleolar histone deacetylase HD2-p39.               |
| Os04g0165700 | 1.467 | 312  | 3  | 9.5  | Cysteine synthase.                                              |

|              |       |       |    |      |                                                                 |
|--------------|-------|-------|----|------|-----------------------------------------------------------------|
| Os02g0822200 | 1.46  | 135   | 2  | 5.7  | Peptidase C12, ubiquitin carboxyl-terminal hydrolase 1 protein. |
| Os02g0713400 | 1.458 | 503   | 5  | 29.9 | Similar to Thioredoxin reductase 1 (NTR 1).                     |
| Os05g0486700 | 1.457 | 509   | 1  | 19.9 | Ribosomal protein L24e domain containing protein.               |
| Os11g0169800 | 1.457 | 100   | 3  | 11.3 | Similar to Long-chain-fatty-acid--CoA ligase 4 (LACS 4).        |
| Os02g0591800 | 1.451 | 86    | 3  | 13   | Brix domain containing protein.                                 |
| Os07g0586500 | 1.449 | 141   | 5  | 14.3 | Similar to SUMO activating enzyme 2.                            |
| Os01g0188400 | 1.449 | 1110  | 4  | 15.5 | NADP-dependent malic enzyme, chloroplast precursor (NADP-ME).   |
| Os06g0731800 | 1.448 | 309   | 1  | 5.2  | Clathrin light chain family protein.                            |
| Os12g0548401 | 1.447 | 999   | 4  | 54.5 | Similar to Proteinase inhibitor.                                |
| Os04g0533300 | 1.445 | 153   | 3  | 19.4 | Similar to Remorin (pp34).                                      |
| Os07g0182100 | 1.444 | 272   | 7  | 30.1 | Similar to Tryptophan synthase alpha chain.                     |
| Os11g0216400 | 1.44  | 303   | 2  | 8.6  | Peptidase S8, subtilisin-related domain containing protein.     |
| Os10g0555900 | 1.433 | 344   | 5  | 28.7 | Beta-expansin precursor.                                        |
| Os11g0703900 | 1.432 | 16099 | 4  | 48.8 | Heat shock protein 70.                                          |
| Os04g0462500 | 1.43  | 4933  | 1  | 54.2 | Similar to 14-3-3-like protein GF14-6.                          |
| Os03g0288600 | 1.427 | 107   | 3  | 8    | Muscle derived-like protein.                                    |
| Os02g0717400 | 1.425 | 875   | 15 | 15.7 | Tetratricopeptide-like helical domain containing protein.       |
| Os03g0823700 | 1.421 | 564   | 3  | 40.9 | Similar to Ras-related protein Rab11C.                          |
| Os06g0656500 | 1.42  | 160   | 3  | 13.8 | Similar to 4-coumarate--CoA ligase 1.                           |
| Os07g0551400 | 1.418 | 406   | 2  | 22.4 | Rossmann-like alpha/beta/alpha sandwich fold domain protein.    |
| Os02g0767500 | 1.417 | 701   | 2  | 25.8 | Mitochondrial phosphate transporter.                            |
| Os09g0542000 | 1.416 | 388   | 4  | 14.9 | Similar to Ribonuclease P.                                      |
| Os06g0247800 | 1.415 | 863   | 4  | 21.6 | Similar to Dynamin-like protein (Fragment).                     |
| Os03g0802700 | 1.415 | 235   | 6  | 10.5 | RH27 helicase (Fragment).                                       |
| Os12g0506400 | 1.415 | 95    | 1  | 6.7  | Cornichon family protein.                                       |
| Os01g0276700 | 1.414 | 1642  | 14 | 38.8 | Similar to Pyruvate kinase, cytosolic isozyme.                  |

|              |       |      |    |      |                                                                 |
|--------------|-------|------|----|------|-----------------------------------------------------------------|
| Os01g0883900 | 1.413 | 305  | 13 | 21.7 | DUF248, methyltransferase putative family protein.              |
| Os07g0622200 | 1.41  | 786  | 9  | 25.7 | Similar to M-160-u1_1 (Fragment).                               |
| Os03g0718100 | 1.409 | 3081 | 2  | 41.9 | Actin 1.                                                        |
| Os06g0133800 | 1.408 | 1492 | 12 | 28.6 | Similar to Transferase.                                         |
| Os07g0539100 | 1.408 | 619  | 8  | 22.6 | Glycoside hydrolase, family 17 protein.                         |
| Os10g0564300 | 1.407 | 714  | 3  | 28.7 | Similar to 60S ribosomal protein L27.                           |
| Os12g0605400 | 1.406 | 244  | 4  | 33.6 | Similar to CROC-1-like protein (Fragment).                      |
| Os12g0443700 | 1.405 | 1191 | 16 | 39.2 | Similar to Glu-prolyl-tRNA aminoacyl synthetase (Fragment).     |
| Os03g0700400 | 1.399 | 1056 | 3  | 37.3 | Similar to LOX4 (Fragment).                                     |
| Os03g0688200 | 1.392 | 463  | 4  | 13.5 | Conserved hypothetical protein.                                 |
| Os11g0104900 | 1.392 | 1236 | 16 | 23.7 | Similar to Clathrin heavy chain.                                |
| Os08g0117300 | 1.39  | 2212 | 3  | 57   | Similar to 40S ribosomal protein S13.                           |
| Os04g0249600 | 1.389 | 151  | 2  | 23.9 | Rhodanese-like domain containing protein.                       |
| Os07g0109500 | 1.388 | 504  | 4  | 31.6 | Ribosomal protein L13 family protein.                           |
| Os02g0182500 | 1.386 | 670  | 1  | 29.4 | Similar to Proteasome subunit beta type 3.                      |
| Os05g0399100 | 1.385 | 290  | 3  | 14.2 | Similar to Endo-1,3;1,4-beta-D-glucanase.                       |
| Os03g0703100 | 1.384 | 265  | 6  | 13.7 | Similar to Beta-glucosidase.                                    |
| Os08g0555200 | 1.381 | 238  | 3  | 6.7  | Nonaspanin (TM9SF) family protein.                              |
| Os03g0158500 | 1.38  | 172  | 5  | 7.6  | YT521-B-like protein family protein.                            |
| Os11g0171500 | 1.38  | 593  | 7  | 27.9 | Similar to Calcium-dependent protein kinase SK5 (CDPK).         |
| Os07g0603100 | 1.378 | 149  | 2  | 5.1  | Nucleotide-binding, alpha-beta plait domain containing protein. |
| Os03g0577000 | 1.377 | 1613 | 6  | 45.6 | Similar to Ribosomal protein S3 (Fragment).                     |
| Os08g0162000 | 1.377 | 73   | 2  | 14.6 | Similar to transmembrane 9 superfamily protein member 1.        |
| Os01g0938200 | 1.376 | 142  | 4  | 9.6  | Similar to RNA-binding protein BRUNOL5 (Fragment).              |
| Os10g0377400 | 1.375 | 693  | 6  | 33.8 | Similar to Ras-related protein Rab11D.                          |
| Os12g0207300 | 1.375 | 52   | 2  | 12.7 | Similar to Clathrin coat assembly protein AP17.                 |

|              |       |       |   |      |                                                                |
|--------------|-------|-------|---|------|----------------------------------------------------------------|
| Os03g0693900 | 1.375 | 111   | 3 | 13.2 | Similar to Oxalate oxidase 1 (EC 1.2.3.4) (Germin).            |
| Os03g0212800 | 1.375 | 262   | 5 | 13.4 | Similar to Beta-glucosidase.                                   |
| Os10g0573800 | 1.373 | 669   | 6 | 34.8 | Mitochondrial carnitine/acylcarnitine carrier-like protein.    |
| Os03g0276500 | 1.371 | 9562  | 9 | 47.5 | Similar to Heat shock protein 70.                              |
| Os05g0539700 | 1.37  | 727   | 9 | 28   | Similar to Nucleosome assembly protein 1.                      |
| Os07g0614500 | 1.37  | 1784  | 7 | 59.4 | Similar to Elongation factor 1 beta 2.                         |
| Os02g0785800 | 1.37  | 356   | 2 | 37.5 | Similar to Ribosomal protein L35A.                             |
| Os07g0636000 | 1.366 | 1977  | 4 | 32.5 | Similar to H/ACA ribonucleoprotein complex subunit 4.          |
| Os06g0671900 | 1.365 | 10005 | 2 | 58.5 | Similar to Tubulin beta-3 chain.                               |
| Os03g0231600 | 1.365 | 241   | 3 | 9.4  | Similar to Branched-chain-amino-acid aminotransferase 3.       |
| Os06g0163200 | 1.365 | 64    | 2 | 5.9  | Esterase/lipase/thioesterase domain containing protein.        |
| Os07g0114400 | 1.364 | 246   | 6 | 25.8 | Casein kinase II alpha subunit.                                |
| Os02g0313400 | 1.364 | 227   | 3 | 11.4 | Apoptosis inhibitory 5 family protein.                         |
| Os02g0602500 | 1.364 | 75    | 4 | 16.5 | Similar to Pre-mRNA-splicing factor ISY1.                      |
| Os09g0375000 | 1.364 | 439   | 6 | 18.6 | Enolase (EC 4.2.1.11) (Fragment).                              |
| Os05g0558000 | 1.363 | 408   | 8 | 30.1 | Ribosomal protein L1 family protein.                           |
| Os06g0574450 | 1.363 | 90    | 2 | 5.8  | Hypothetical conserved gene.                                   |
| Os05g0103100 | 1.36  | 788   | 3 | 23.1 | Translocon-associated beta family protein.                     |
| Os03g0757900 | 1.359 | 4804  | 5 | 65   | Similar to UDP-glucose 6-dehydrogenase.                        |
| Os02g0576700 | 1.359 | 857   | 8 | 44   | Nucleosome assembly protein (NAP) family protein.              |
| Os06g0308300 | 1.352 | 571   | 6 | 15.5 | Similar to 65kD microtubule associated protein.                |
| Os03g0333300 | 1.35  | 414   | 2 | 39.3 | Similar to eIF-2-beta (P38).                                   |
| Os12g0623900 | 1.35  | 9641  | 7 | 48.8 | Similar to Ethylene-responsive methionine synthase (Fragment). |
| Os10g0530900 | 1.349 | 458   | 4 | 25.8 | Similar to Glutathione S-transferase GST 30.                   |
| Os04g0497200 | 1.348 | 169   | 4 | 9.3  | Cellulase precursor.                                           |
| Os09g0497400 | 1.345 | 149   | 2 | 12.4 | DUF850, transmembrane eukaryotic family protein.               |

|              |       |      |    |      |                                                          |
|--------------|-------|------|----|------|----------------------------------------------------------|
| Os01g0627500 | 1.343 | 66   | 4  | 7.3  | Cytochrome P450 family protein.                          |
| Os08g0532900 | 1.343 | 156  | 1  | 6.1  | emp24/gp25L/p24 family protein.                          |
| Os01g0708100 | 1.343 | 239  | 9  | 21.5 | Similar to N-myristoyl transferase.                      |
| Os02g0821800 | 1.343 | 1627 | 8  | 42.9 | Similar to Fibrillarin-2.                                |
| Os03g0836200 | 1.342 | 137  | 2  | 12.7 | Similar to RNA-binding protein RZ-1.                     |
| Os05g0235800 | 1.339 | 331  | 6  | 10.8 | DNA-dependent ATPase MCM domain containing protein.      |
| Os07g0613200 | 1.339 | 380  | 3  | 28.1 | Similar to 60S ribosomal protein L27a-3.                 |
| Os11g0240600 | 1.336 | 235  | 2  | 7.7  | Alpha/beta hydrolase fold-3 domain containing protein.   |
| Os05g0134400 | 1.336 | 1288 | 6  | 26.3 | Similar to peroxidase 1.                                 |
| Os04g0107600 | 1.335 | 1423 | 11 | 27.9 | Arginine decarboxylase.                                  |
| Os08g0113100 | 1.335 | 3729 | 16 | 60.4 | Similar to Fructokinase (Fragment).                      |
| Os02g0102700 | 1.335 | 470  | 3  | 25.8 | Similar to AGL157Cp.                                     |
| Os09g0497700 | 1.333 | 253  | 5  | 15.5 | Autophagy protein 16 domain containing protein.          |
| Os03g0181500 | 1.333 | 551  | 6  | 15.3 | Similar to Fiddlehead protein.                           |
| Os01g0874700 | 1.331 | 1087 | 12 | 34.3 | GOLD domain containing protein.                          |
| Os07g0624700 | 1.331 | 383  | 3  | 28.6 | UMP/CMP kinase a (EC 2.7.1.48).                          |
| Os05g0243300 | 1.33  | 149  | 2  | 11   | Similar to 50S ribosomal protein L13.                    |
| Os04g0483500 | 1.327 | 389  | 6  | 23   | Similar to B-keto acyl reductase.                        |
| Os04g0504800 | 1.325 | 431  | 6  | 13.5 | Similar to Poly(A)-binding protein.                      |
| Os02g0541325 | 1.324 | 85   | 2  | 5.6  | Similar to Serine decarboxylase.                         |
| Os03g0599800 | 1.323 | 4641 | 11 | 58.8 | Reversibly glycosylated polypeptide.                     |
| Os08g0500700 | 1.323 | 4516 | 8  | 40.6 | Similar to Heat shock protein 82.                        |
| Os03g0749300 | 1.319 | 851  | 8  | 27.2 | Similar to Exoglucanase precursor.                       |
| Os01g0294700 | 1.317 | 707  | 8  | 33.7 | Haem peroxidase, plant/fungal/bacterial family protein.  |
| Os03g0268400 | 1.316 | 100  | 4  | 13.3 | Similar to Mannose-1-phosphate guanyltransferase.        |
| Os05g0574500 | 1.316 | 568  | 2  | 32.6 | Similar to GTP-binding nuclear protein Ran1B (Fragment). |

|              |       |      |    |      |                                                                                        |
|--------------|-------|------|----|------|----------------------------------------------------------------------------------------|
| Os03g0648400 | 1.314 | 832  | 3  | 18   | Similar to DnaJ protein homolog (DNAJ-1).                                              |
| Os01g0814900 | 1.314 | 611  | 5  | 23.7 | Similar to Cytochrome b5 reductase.                                                    |
| Os05g0482700 | 1.313 | 1878 | 9  | 38.8 | Similar to 2,3-bisphosphoglycerate-independent phosphoglycerate.                       |
| Os04g0618500 | 1.313 | 98   | 3  | 14.1 | Similar to Gamma-SNAP (Fragment).                                                      |
| Os06g0598900 | 1.31  | 479  | 7  | 30.7 | Similar to Serine-threonine kinase receptor-associated protein.                        |
| Os07g0448800 | 1.309 | 531  | 5  | 18.3 | Aquaporin.                                                                             |
| Os07g0671700 | 1.309 | 130  | 4  | 9.8  | Similar to Arginine methyltransferase-like protein.                                    |
| Os10g0533600 | 1.309 | 119  | 3  | 12.5 | Similar to Mitogen-activated protein kinase homolog MMK2.                              |
| Os03g0733400 | 1.307 | 449  | 4  | 20.8 | Zinc finger, BED-type predicted domain containing protein.                             |
| Os09g0237600 | 1.306 | 349  | 5  | 18.7 | Serine/threonine protein kinase-related domain protein.                                |
| Os05g0186300 | 1.306 | 1436 | 6  | 27.9 | Similar to NADP-malic enzyme.                                                          |
| Os03g0780400 | 1.306 | 335  | 4  | 43.4 | Similar to Actin-depolymerizing factor 6 (ADF-6) (AtADF6).                             |
| Os02g0739600 | 1.305 | 662  | 9  | 34.4 | Similar to Pyruvate dehydrogenase E1 component alpha subunit.                          |
| Os02g0498700 | 1.304 | 61   | 2  | 6.6  | Similar to QUA1.                                                                       |
| Os05g0373700 | 1.304 | 1231 | 2  | 43.4 | Similar to NAC-alpha-like protein 3.                                                   |
| Os05g0155100 | 1.303 | 790  | 5  | 33.5 | Similar to 60S ribosomal protein L18.                                                  |
| Os03g0750700 | 1.302 | 399  | 9  | 37.8 | Six-bladed beta-propeller, TolB-like domain containing protein.                        |
| Os01g0323600 | 1.298 | 2002 | 4  | 52   | Similar to S-adenosylmethionine synthase 2.                                            |
| Os02g0240100 | 1.298 | 568  | 5  | 19   | Similar to Peroxidase 2 (Fragment).                                                    |
| Os02g0529600 | 1.298 | 141  | 5  | 16   | Similar to Xyloglucan 6-xylosyltransferase (AtXT1).                                    |
| Os07g0546000 | 1.298 | 672  | 4  | 42.4 | Similar to Isopentenyl pyrophosphate:dimethylallyl pyrophosphate isomerase (Fragment). |
| Os05g0400700 | 1.296 | 81   | 3  | 20.9 | Similar to DNA-directed RNA polymerase II 19 kDa polypeptide.                          |
| Os09g0565200 | 1.294 | 75   | 2  | 7.8  | Similar to Nucleic acid-binding protein precursor.                                     |
| Os02g0580300 | 1.293 | 4913 | 3  | 63   | Similar to 14-3-3 protein 6.                                                           |
| Os01g0617500 | 1.293 | 1118 | 19 | 24.3 | Tetratricopeptide-like helical domain containing protein.                              |

|              |       |      |    |      |                                                                   |
|--------------|-------|------|----|------|-------------------------------------------------------------------|
| Os02g0247200 | 1.292 | 367  | 4  | 16.5 | Similar to T-complex protein 1, gamma subunit (TCP-1-gamma).      |
| Os04g0459700 | 1.292 | 274  | 6  | 36.7 | Similar to H0219H12.3 protein.                                    |
| Os11g0432900 | 1.291 | 305  | 7  | 21.3 | Peptidase S10, serine carboxypeptidase family protein.            |
| Os08g0465800 | 1.291 | 952  | 8  | 33.4 | Similar to Glutamate decarboxylase.                               |
| Os06g0680700 | 1.291 | 220  | 7  | 15.1 | Cytochrome P450 family protein.                                   |
| Os03g0402000 | 1.29  | 327  | 6  | 35.3 | TRAPP I complex, Bet3 domain containing protein.                  |
| Os03g0105600 | 1.29  | 8901 | 4  | 52.6 | Tubulin beta-1 chain (Beta-1 tubulin).                            |
| Os02g0497700 | 1.288 | 285  | 4  | 11.7 | Similar to Ras-GTPase-activating protein.                         |
| Os07g0616600 | 1.287 | 2524 | 4  | 48.5 | Similar to 40S ribosomal protein SA (p40).                        |
| Os07g0440100 | 1.287 | 995  | 6  | 29.4 | Conserved hypothetical protein.                                   |
| Os01g0871300 | 1.287 | 407  | 8  | 24.7 | Pyridoxal phosphate-dependent transferase.                        |
| Os05g0543400 | 1.286 | 364  | 5  | 27.3 | Similar to Farnesyl diphosphate synthase (Fragment).              |
| Os06g0157000 | 1.286 | 534  | 5  | 21.4 | Esterase, SGNH hydrolase-type domain containing protein.          |
| Os05g0533100 | 1.282 | 393  | 3  | 18.5 | Similar to plasminogen activator inhibitor 1 RNA-binding protein. |
| Os11g0585700 | 1.282 | 130  | 3  | 14.7 | Similar to 50S ribosomal protein L4.                              |
| Os12g0568800 | 1.28  | 505  | 7  | 17.9 | Similar to predicted protein.                                     |
| Os10g0516400 | 1.28  | 604  | 8  | 38.8 | Conserved hypothetical protein.                                   |
| Os03g0236200 | 1.278 | 341  | 2  | 20.1 | Similar to Glutamate decarboxylase isozyme 3.                     |
| Os12g0489100 | 1.278 | 101  | 3  | 6.7  | Similar to Ubiquitin-specific protease 12.                        |
| Os01g0570700 | 1.276 | 360  | 4  | 14.4 | Carbamoyl-phosphate synthetase, large subunit.                    |
| Os02g0177600 | 1.276 | 289  | 5  | 17.5 | Similar to 4-coumarate--CoA ligase 1 (Fragment).                  |
| Os08g0459300 | 1.276 | 375  | 2  | 19   | Conserved hypothetical protein.                                   |
| Os04g0473400 | 1.275 | 1310 | 7  | 42.8 | Similar to 60S ribosomal protein L6-B (L17) (YL16) (RP18).        |
| Os06g0167000 | 1.274 | 172  | 9  | 9.9  | Similar to PRP8 protein (Fragment).                               |
| Os02g0554900 | 1.273 | 110  | 4  | 9    | Similar to Protein disulfide isomerase (Fragment).                |
| Os02g0626100 | 1.273 | 4962 | 18 | 47.1 | Similar to Phenylalanine ammonia-lyase.                           |



|              |       |       |    |      |                                                                       |
|--------------|-------|-------|----|------|-----------------------------------------------------------------------|
| Os08g0162100 | 1.272 | 225   | 5  | 11.4 | Similar to CTV.2.                                                     |
| Os05g0363200 | 1.272 | 1452  | 7  | 26.8 | UDP-glucuronic acid decarboxylase.                                    |
| Os03g0711400 | 1.27  | 3582  | 6  | 37.2 | Similar to Coatomer alpha subunit.                                    |
| Os05g0531200 | 1.27  | 362   | 4  | 27.7 | Pollen Ole e 1 allergen and extensin domain containing protein.       |
| Os11g0455800 | 1.27  | 1522  | 12 | 40.1 | Similar to Serine hydroxymethyltransferase.                           |
| Os03g0807700 | 1.269 | 1648  | 10 | 35.9 | Protein of unknown function DUF642 domain containing protein.         |
| Os03g0791800 | 1.269 | 103   | 1  | 11.2 | Rad6 (Ubiquitin carrier protein).                                     |
| Os07g0600400 | 1.268 | 126   | 5  | 13.8 | WD40/YVTN repeat-like domain containing protein.                      |
| Os06g0701100 | 1.268 | 3807  | 4  | 52.7 | Eukaryotic initiation factor 4A (eIF4A) (eIF-4A).                     |
| Os07g0688800 | 1.266 | 248   | 4  | 8.5  | Aldehyde dehydrogenase domain containing protein.                     |
| Os01g0654500 | 1.266 | 1996  | 14 | 47.8 | Similar to NADP-isocitrate dehydrogenase.                             |
| Os01g0899425 | 1.266 | 1115  | 1  | 67   | Similar to ribulose 1,5-bisphosphate carboxylase large subunit.       |
| Os03g0341100 | 1.265 | 506   | 4  | 28.3 | Similar to 60S ribosomal protein L18.                                 |
| Os04g0103200 | 1.265 | 1120  | 16 | 46.4 | Proteasome component region PCI domain containing protein.            |
| Os03g0406200 | 1.265 | 864   | 7  | 67.7 | Elongation factor 1 beta 2.                                           |
| Os06g0127000 | 1.264 | 335   | 2  | 10.7 | Peroxisomal biogenesis factor 11 family protein.                      |
| Os12g0145100 | 1.264 | 244   | 4  | 40.8 | Similar to Wali7 protein (Fragment).                                  |
| Os05g0108800 | 1.261 | 652   | 3  | 52.6 | Cytochrome b5.                                                        |
| Os03g0424500 | 1.258 | 1103  | 7  | 42.5 | Similar to 40S ribosomal protein S19-3.                               |
| Os04g0486600 | 1.258 | 10092 | 8  | 65   | Similar to Glyceraldehyde-3-phosphate dehydrogenase, cytosolic 3.     |
| Os04g0669800 | 1.256 | 441   | 10 | 32.6 | Methylthioribose kinase.                                              |
| Os09g0485900 | 1.256 | 1741  | 1  | 41.1 | Similar to 60S ribosomal protein L9 (Gibberellin-regulated protein ). |
| Os07g0683900 | 1.253 | 799   | 7  | 32.1 | Ricin B-related lectin domain containing protein.                     |
| Os12g0624000 | 1.252 | 10001 | 7  | 48.8 | Similar to Methionine synthase protein.                               |
| Os08g0430500 | 1.251 | 4028  | 6  | 62.9 | Similar to 14-3-3-like protein S94.                                   |
| Os10g0569200 | 1.25  | 1125  | 21 | 35.2 | Six-bladed beta-propeller, TolB-like domain containing protein.       |

|              |       |      |    |      |                                                                       |
|--------------|-------|------|----|------|-----------------------------------------------------------------------|
| Os04g0485000 | 1.249 | 781  | 5  | 19   | Similar to 26S proteasome subunit RPN7.                               |
| Os01g0532200 | 1.247 | 240  | 8  | 20.6 | FF domain domain containing protein.                                  |
| Os03g0209000 | 1.246 | 123  | 2  | 12.3 | Similar to MFP1 attachment factor 1.                                  |
| Os03g0335300 | 1.245 | 193  | 4  | 7.3  | Similar to Vacuolar sorting receptor homolog (Fragment).              |
| Os01g0342900 | 1.245 | 730  | 12 | 28.8 | Similar to Adenosine monophosphate binding protein 1 AMPBP1.          |
| Os07g0689300 | 1.244 | 208  | 5  | 17.2 | Similar to Lon protease homolog, mitochondrial.                       |
| Os09g0539800 | 1.244 | 739  | 3  | 54.2 | Similar to Acyl carrier protein III, chloroplast precursor (ACP III). |
| Os09g0415700 | 1.242 | 456  | 5  | 19.5 | DUF248, methyltransferase putative family protein.                    |
| Os08g0240800 | 1.241 | 222  | 7  | 9.5  | Similar to Actin filament bundling protein P-115-ABP.                 |
| Os04g0446300 | 1.241 | 211  | 1  | 6.2  | Microsomal signal peptidase 25 kDa subunit family protein.            |
| Os04g0372800 | 1.239 | 596  | 5  | 16.7 | Nucleotide-binding, alpha-beta plait domain containing protein.       |
| Os08g0321000 | 1.238 | 649  | 5  | 16.6 | FAS1 domain domain containing protein.                                |
| Os03g0628900 | 1.238 | 332  | 3  | 26.2 | Prefoldin domain containing protein.                                  |
| Os06g0571400 | 1.236 | 1585 | 4  | 30.8 | Similar to Elongation factor 1 gamma-like protein (Fragment).         |
| Os03g0713000 | 1.235 | 589  | 11 | 28.4 | Similar to Chloroplast threonine deaminase 1.                         |
| Os07g0204500 | 1.234 | 87   | 2  | 6.6  | Survival protein SurE family protein.                                 |
| Os03g0767000 | 1.233 | 266  | 10 | 22.1 | Similar to Allene oxide synthase.                                     |
| Os03g0182700 | 1.233 | 666  | 6  | 30.5 | Eukaryotic translation initiation factor 3 subunit 12 (eIF3k).        |
| Os08g0112800 | 1.232 | 207  | 4  | 40.1 | Rickettsia 17 kDa surface antigen family protein.                     |
| Os04g0556300 | 1.232 | 139  | 2  | 17.3 | Glutathione peroxidase.                                               |
| Os10g0551800 | 1.231 | 397  | 1  | 10.3 | Root-specific protein (RCc2 protein).                                 |
| Os02g0287000 | 1.231 | 1605 | 4  | 48.3 | Similar to 40S ribosomal protein S3a (CYC07 protein).                 |
| Os02g0503400 | 1.229 | 99   | 2  | 13.8 | Similar to 60S ribosomal protein L35.                                 |
| Os11g0256050 | 1.225 | 177  | 4  | 22.1 | Hypothetical conserved gene.                                          |
| Os01g0191500 | 1.225 | 581  | 11 | 36   | Similar to Mitochondrial processing peptidase.                        |
| Os03g0264400 | 1.225 | 186  | 4  | 11.2 | Anthranilate synthase alpha 2 subunit.                                |

|              |       |      |    |      |                                                                     |
|--------------|-------|------|----|------|---------------------------------------------------------------------|
| Os02g0672200 | 1.225 | 493  | 7  | 17.9 | Similar to AGO1 homologous protein.                                 |
| Os01g0710000 | 1.224 | 622  | 9  | 35.1 | Similar to WD-repeat protein RBAP1.                                 |
| Os05g0512600 | 1.224 | 365  | 2  | 15.4 | X8 domain containing protein.                                       |
| Os03g0112101 | 1.224 | 176  | 6  | 15.4 | Similar to Adaptin N terminal region family protein, expressed.     |
| Os06g0695300 | 1.224 | 460  | 5  | 27.1 | Haem peroxidase, plant/fungal/bacterial family protein.             |
| Os11g0525200 | 1.224 | 1142 | 15 | 34.3 | Similar to Cytochrome P450 51.                                      |
| Os03g0177400 | 1.223 | 7049 | 13 | 46.5 | EF-1 alpha.                                                         |
| Os12g0566300 | 1.223 | 883  | 6  | 25.1 | Similar to ATP citrate lyase beta (Fragment).                       |
| Os03g0717600 | 1.222 | 288  | 7  | 17.2 | Zinc finger, C2H2-type matrix domain containing protein.            |
| Os03g0198400 | 1.222 | 682  | 11 | 27.9 | Similar to Seryl-tRNA synthetase (SerRS) (Fragment).                |
| Os09g0407950 | 1.222 | 257  | 7  | 10.7 | Similar to transducin family protein / WD-40 repeat family protein. |
| Os02g0173500 | 1.222 | 213  | 4  | 17.1 | Similar to Cholinephosphate cytidyltransferase.                     |
| Os06g0300800 | 1.222 | 312  | 6  | 9.3  | Hypothetical conserved gene.                                        |
| Os10g0355800 | 1.221 | 2143 | 4  | 38.1 | Similar to ATP synthase CF1 beta subunit.                           |
| Os03g0283100 | 1.221 | 554  | 7  | 38.1 | Similar to In2-1 protein.                                           |
| Os05g0320700 | 1.22  | 701  | 17 | 42   | Similar to Cytochrome P450.                                         |
| Os01g0300200 | 1.217 | 2223 | 20 | 41.4 | Similar to ATP-citrate lyase subunit B.                             |
| Os04g0620700 | 1.216 | 1213 | 8  | 15.8 | Nucleotide-binding, alpha-beta plait domain containing protein.     |
| Os01g0235400 | 1.215 | 451  | 6  | 17.3 | Similar to Importin-alpha re-exporter.                              |
| Os01g0290100 | 1.215 | 196  | 5  | 14.7 | Pyridoxal phosphate-dependent transferase.                          |
| Os04g0397100 | 1.214 | 678  | 3  | 40.2 | Similar to ClpC protease.                                           |
| Os05g0585900 | 1.214 | 240  | 5  | 20.3 | Mitochondrial carrier protein domain containing protein.            |
| Os05g0432400 | 1.214 | 201  | 4  | 9.7  | Hypothetical conserved gene.                                        |
| Os03g0807600 | 1.212 | 489  | 3  | 19.5 | Similar to Cyclopropane-fatty-acyl-phospholipid synthase.           |
| Os03g0221500 | 1.211 | 398  | 3  | 7.5  | Glycoside hydrolase, family 17 protein.                             |
| Os09g0378300 | 1.211 | 826  | 7  | 20.1 | Similar to Leucyl-tRNA synthetase, cytoplasmic (LeuRS).             |

|              |       |      |    |      |                                                                 |
|--------------|-------|------|----|------|-----------------------------------------------------------------|
| Os05g0181000 | 1.209 | 1413 | 11 | 27.3 | Heat shock protein Hsp70 family protein.                        |
| Os03g0141000 | 1.207 | 119  | 4  | 33.8 | 60S ribosomal protein L21.                                      |
| Os05g0168400 | 1.206 | 121  | 5  | 26   | Conserved hypothetical protein.                                 |
| Os07g0694700 | 1.205 | 1771 | 7  | 52.2 | L-ascorbate peroxidase.                                         |
| Os09g0515200 | 1.205 | 1437 | 10 | 48.8 | Beta 7 subunit of 20S proteasome.                               |
| Os01g0895600 | 1.204 | 467  | 6  | 28.8 | Similar to Calreticulin-3.                                      |
| Os03g0854300 | 1.201 | 83   | 3  | 7.5  | Nucleotide-binding, alpha-beta plait domain containing protein. |

**Supplementary Table 5.** List of common target proteins in embryos of germinated rice seeds in response to both BR-deficiency and BR-insensitivity by iTRAQ (fold-change criterion  $\geq 1.5$  or  $\leq 0.67$ )

| Gene ID      | NIP(BRZ / Mock)<br>fold change | d61/NIP<br>fold change | Protein<br>score | Unique<br>Peptide | Sequence<br>coverage(%) | Description                                               |
|--------------|--------------------------------|------------------------|------------------|-------------------|-------------------------|-----------------------------------------------------------|
| Os02g0249000 | 0.406                          | 0.411                  | 804              | 10                | 22.7                    | Glutelin, Seed storage protein                            |
| Os02g0249600 | 0.568                          | 0.57                   | 3780             | 1                 | 34.9                    | Similar to Glutelin.                                      |
| Os02g0249800 | 0.452                          | 0.45                   | 3900             | 2                 | 36.3                    | Glutelin precursor. >Os02t0249900-01 Glutelin precursor.  |
| Os02g0453600 | 0.459                          | 0.414                  | 539              | 5                 | 28.1                    | Similar to Glutelin.                                      |
| Os02g0765600 | 0.576                          | 0.561                  | 660              | 9                 | 32.5                    | Alpha-amylase glycoprotein, Degradation of starch granule |
| Os03g0734200 | 0.639                          | 0.566                  | 254              | 1                 | 17.4                    | Conserved hypothetical protein.                           |
| Os05g0268500 | 0.451                          | 0.369                  | 131              | 5                 | 12                      | Similar to Serine carboxypeptidase 2.                     |
| Os05g0329100 | 0.555                          | 0.421                  | 917              | 3                 | 42.7                    | Prolamin.                                                 |
| Os06g0133000 | 0.482                          | 0.57                   | 495              | 9                 | 22.2                    | Granule-bound starch synthase I, chloroplast precursor    |
| Os07g0214300 | 0.474                          | 0.321                  | 1815             | 2                 | 28.3                    | Seed allergenic protein RAG2 precursor.                   |
| Os07g0214600 | 0.465                          | 0.383                  | 606              | 3                 | 25.5                    | Similar to Seed allergenic protein RA17 precursor.        |
| Os07g0237100 | 0.667                          | 0.59                   | 121              | 2                 | 8.5                     | RNA recognition motif domain domain containing protein.   |

|              |       |       |     |   |      |                                                       |
|--------------|-------|-------|-----|---|------|-------------------------------------------------------|
| Os01g0815800 | 2.061 | 2.224 | 682 | 1 | 19.8 | Similar to 60S ribosomal protein L24-A (L30A) (RP29). |
| Os03g0799000 | 1.997 | 2.018 | 126 | 2 | 18.4 | Similar to Histone H1.                                |
| Os02g0675700 | 1.741 | 1.617 | 236 | 4 | 18.4 | methyltransferase putative family protein.            |
| Os01g0880800 | 1.585 | 1.835 | 891 | 5 | 16.8 | Similar to Acyl-[acyl-carrier-protein] desaturase     |
| Os06g0705400 | 1.607 | 0.609 | 205 | 1 | 11.7 | Similar to Nonspecific lipid-transfer protein 2P.     |
| Os09g0127700 | 1.506 | 0.4   | 221 | 2 | 21.5 | Conserved hypothetical protein.                       |

**Supplementary Table 6.** List of primers used for quantitative real-time PCR assay

| Primer name | Primer sequence (5'-3')   |
|-------------|---------------------------|
| RAmy1AqRT-F | CATACATCCTCACCCACCCCG     |
| RAmy1AqRT-R | ATCCCCTGCCGGTTTCTGAT      |
| MFT2qRT-F   | CCGCAACGACCTCTACACCC      |
| MFT2qRT-F   | CTCGTACAGCACCAGCACGTA     |
| HDqRT-F     | TCCCTCACCTGAAGAAGACGC     |
| HDqRT-R     | GGTGATCTCCGACTCGACCA      |
| PKqRT-F     | GCTGTCTGGTGAAACTGCCC      |
| PKqRT-R     | CCTCGTTGAGCAGAGCCTGA      |
| SBE1qRT-F   | CAAAACACAAGATGGAGAAGGATA  |
| SBE1qRT-R   | TTGTGAGGGATGGCAGGCT       |
| LOX3qRT-F   | CTGTGCTGGTGGAGCAGAT       |
| LOX3qRT-R   | CGCCTTGATCGAGTAGCCCA      |
| UBCqRT-F    | CCGTTTGTAGAGCCATAATTGCA   |
| UBCqRT-R    | AGGTTGCCTGAGTCACAGTTAAGTG |
